1 **Title: Quantitative analysis of three-dimensional cell organisation and**  
2 **concentration profiles within curved epithelial tissues**

3 **Authors:**

4 Chaitra Prabhakara <sup>1,\*</sup>, Krishnan Swaminathan Iyer <sup>2</sup>, Madan Rao <sup>2</sup>, Timothy E Saunders <sup>3,4,\*</sup>, Satyajit  
5 Mayor <sup>1,\*</sup>

6 **Affiliations:**

7 1 – National Centre for Biological Sciences (TIFR), Bengaluru, India

8 2 – Simons Centre for the Study of Living Machines, National Centre for Biological Sciences (TIFR),  
9 Bengaluru, India

10 3 – Warwick Medical School, University of Warwick, Coventry, United Kingdom

11 4 – Mechanobiology Institute, National University of Singapore, Singapore, Singapore

12 \* - corresponding authors ([chaitrap@ncbs.res.in](mailto:chaitrap@ncbs.res.in), [timothy.saunders@warwick.ac.uk](mailto:timothy.saunders@warwick.ac.uk), [mayor@ncbs.res.in](mailto:mayor@ncbs.res.in))

13 **Manuscript Details:**

14 Main Text with Abstract, Introduction, Results, Discussion and References

15 Supplementary Text with Methods

16 7 Main Figures

17 6 Supplementary Figures

18 **Abstract: (200 words)**

19 Organogenesis involves folding of flat epithelial tissues into three-dimensional (3D) shapes. Quantitative  
20 analysis in 3D of the concentration gradients of biochemical and mechano-chemical cues that shape the  
21 tissue has remained a challenge, due to the complex tissue geometries. Towards addressing this, we  
22 present a methodology that transforms the cartesian images acquired by high-resolution confocal  
23 microscopy of curved tissues into a laminar organisation from the outer-most tissue surface. We further  
24 detail a data-based intensity correction method to account for the intensity variations that arise as a  
25 consequence of the global geometry. Applying our approach to the dome-shaped *Drosophila* wing disc,  
26 we quantitatively estimate the concentration profiles of different biochemical signals, including the  
27 Wingless morphogen gradient. The laminar data-organisation method also enabled visualisation of apical  
28 and basal layers facilitating an accurate 3D reconstruction of cell shapes within the pseudostratified  
29 epithelium. We find that the columnar disc proper cells have irregular 3D shapes and undergo frequent  
30 apico-basal cell intercalations, concomitantly leading to cell neighbour exchanges along the apico-basal  
31 axis. The workflow of image processing described here may be employed to quantify 3D concentration  
32 gradients and 3D cellular organisation in any layered curved tissue, provided a marker describing the  
33 reference surface manifold is available.

34 **Keywords:**

35 Curved Epithelia, Pseudostratified Epithelia, Cell and tissue shape, 3D concentration profiles

36 **Introduction:**

37 Epithelial tissues display a large diversity in both function and form as columnar, cuboidal, or squamous  
38 shapes that are organised in mono or multilayers. Typical epithelial cell cultures consist of a monolayer of  
39 cells which grow and divide, with cell dynamics typically restricted to the two-dimensions (2D) of the  
40 cell culture dish. However, *in vivo*, most epithelia are not just flat sheets of cells and can be considerably  
41 curved with radius of curvature comparable to a few cell lengths (reviewed in (Gómez-Gálvez *et al.*,  
42 2021)). Like an origami crane emerging from a flat sheet of paper with simple folding rules, complex  
43 three-dimensional (3D) epithelial structures observed during development are formed using different  
44 biochemical and mechanical cues (reviewed in (Hamant and Saunders, 2020)). Morphogenetic processes  
45 driven by cell shape changes, cell rearrangements and oriented cell divisions lead to out-of-plane bending  
46 of epithelia into folds, ridges and tubes (reviewed in (Guillot and Lecuit, 2013; Lemke and Nelson,  
47 2021)). Local mechanical properties and their effects on tissue topology can also influence downstream  
48 cell fate decisions by shaping morphogen fields (Shyer *et al.*, 2013; Manning *et al.*, 2015). Studying the  
49 native epithelia in 3D can provide insights into how cells are organised and allow quantitative  
50 measurement of the biochemical concentration profiles that guide organogenesis.

51 Dramatic improvements in microscopy over the last 20 years have resulted in the resurgence of the field  
52 of developmental biology (reviewed in (Keller, 2013)). Modern microscopy techniques aid in multi-  
53 channel, multi-timepoint imaging to achieve single cell resolution in a wide field of view that covers most  
54 of the tissue of interest (Krzic *et al.*, 2012). Such techniques have allowed visualisation of, for example,  
55 (i) morphogen gradients (Gregor *et al.*, 2007; Kicheva *et al.*, 2007; Durrieu *et al.*, 2018), (ii) cell  
56 dynamics leading to tissue formation or repair (Rauzi *et al.*, 2015; Dye *et al.*, 2017; Park *et al.*, 2017), (iii)

57 selective localisation of PCP pathway components (Devenport and Fuchs, 2008; Aigouy *et al.*, 2010), and  
58 (iv) the underlying actin-myosin meshwork bringing about epithelial sheet rearrangements (Martin,  
59 Kaschube and Wieschaus, 2009; Munjal *et al.*, 2015; Streichan *et al.*, 2018). Most of these processes have  
60 been quantitatively studied using maximum intensity projections (MIP) of the curved tissue onto a 2D  
61 plane. Simple MIP has a fundamental drawback: noise, especially from within cells, accumulates in the  
62 projected image and thus, compromises the signal-to-noise ratio. To address this limitation, tools have  
63 been developed to project only the tissue layer from where the intensity arises, such as StackFocuser  
64 (Umorin, 2006), SurfCut (Erguvan *et al.*, 2019), MinCostZSurface, Premosa (Blasse *et al.*, 2017) and  
65 Extended Depth of Field (Forster *et al.*, 2004). These approaches work best when studying processes near  
66 or at the apical surface. However, limitations to such 2D projections are observed when quantifying  
67 signals from the entire apico-basal length of the cell. Despite the rapid advancement of 3D imaging  
68 technologies, these methods are still not commonly used to process and quantify such data.

69 Epithelial cells interact with their neighbours through tight junctions at the apical side and bind to basal  
70 lamina and extracellular matrix on the basal side (reviewed in (Rodriguez-Boulan and Macara, 2014)).  
71 The arrangement of epithelial cells from an apical perspective has been extensively studied (Baena-  
72 López, Baonza and García-Bellido, 2005; Classen *et al.*, 2005; Gibson *et al.*, 2006; Aigouy *et al.*, 2010).  
73 Stereotypical changes in apical cell shape promotes tissue remodelling during invagination and extension.  
74 Apical constriction, as observed in *Drosophila* embryonic mesoderm invagination and neurulation in  
75 vertebrates, is conceptualised as the conversion of taller columnar cells to shorter frusta or bottle-like cells  
76 that have a smaller apical area and a larger basal area (reviewed in (Lecuit and Lenne, 2007)). Convergent  
77 extension brought about by cell intercalations, wherein a group of four cells alter their neighbours through  
78 T1 transitions, is observed during *Drosophila* germband extension (Bertet, Sulak and Lecuit, 2004) and  
79 tube extension of *Drosophila* tracheal system (Ribeiro, Neumann and Affolter, 2004).

80 Is the cell organisation observed on the apical side a representation of how cells are arranged in 3D?  
81 Though more difficult to image and analyse, recent studies (Rupprecht *et al.*, 2017; Sun *et al.*, 2017;  
82 Gómez-Gálvez *et al.*, 2018; Gómez *et al.*, 2021) have shown that cell intercalations occur not only along  
83 the apical surface in time but along the apico-basal axis in space. Such an organisation, unlike apical  
84 constriction, results in different neighbours along the apico-basal axis. Depending on the anisotropy of  
85 apical and basal cell surfaces of the curved epithelium, the cells can be arranged as prisms or frusta or a  
86 combination of frusta and scutoids (Gómez-Gálvez *et al.*, 2018). Understanding the nature of the 3D cell  
87 packing and alterations in cell neighbour changes is important, as these physical properties can affect the  
88 packing density, cell-cell transport of morphogens (Müller *et al.*, 2013) and cell-cell signalling (Yaron,  
89 Cordova and Sprinzak, 2014; Corson *et al.*, 2017), and thereby potentially play a role in altering cell fate  
90 determinations.

91 Here, we develop a framework to organise confocal imaging data of curved epithelia as layers with  
92 respect to the outermost surface of interest. We use the curved pseudostratified epithelium of the wing  
93 imaginal disc as a model system. We describe a method to correct the intensity bias brought about by  
94 imaging artefacts due to sample geometry and use the corrected intensity to quantify intensity distribution  
95 of biochemical signals, such as morphogen gradients, in 3D within each apico-basal layer with respect to  
96 distance from a reference plane. Such a method of organisation also helps in separating the apical and  
97 basal surfaces, reconstructing 3D cellular organisation and quantifying morphometric features such as cell  
98 area and cell neighbours as a function of apico-basal axis.

## 99 **Results:**

### 100 *Organisation of cells in the curved epithelium of the wing imaginal disc*

101 The wing disc is a folded epithelial sac with two kinds of cells: the outer squamous epithelial cells called  
102 the peripodial cells and a single layer of columnar cells called the disc proper (Figure 1A). We focus on  
103 the wing pouch of the wing disc (green region in Figure 1A), which is an elliptical dome with a dense  
104 mesh of columnar cells. Third instar (96-110 h AEL) larval wing discs were dissected and mounted with  
105 spacers to image the tissue in 3D using confocal microscopy (Methods). Images of wing disc expressing  
106 different markers were acquired slice-by-slice to obtain 40-50 $\mu\text{m}$  of optical sectioning, starting from the  
107 top of the dome to the bottom (Schematic in Figure 1B, Figure S1A). Imaging wing discs labelled with an  
108 apical adherens junction marker, *E-Cadherin* (Tepass *et al.*, 1996), describes the manifold of cell  
109 arrangements within the curved tissue (Figure S1). Given the dome shaped nature of the epithelia, the top  
110 Z slices mostly show the apical parts of the cells in the centre, while the remaining imaging planes display  
111 the apical cells towards the tissue periphery (Figure S1A). Orthogonal views of apically localised *E-*  
112 *Cadherin* describe the shape of the wing disc to be a hemi-ellipsoid with curvatures seen along both major  
113 and minor axes (Figure S1B).

114 A simple approach to visualise and analyse 3D datasets is to use a 2D planar projection in the direction of  
115 the imaging axis, defined by the imaging platform as the axis along which the sample is optically  
116 sectioned. Although dimensionality reduction is useful in reducing the data size and enabling additional  
117 analysis routines like cell segmentation and cell tracking, which currently are more robust in 2D  
118 compared to 3D, much of the spatial information is lost (Heemskerk and Streichan, 2015). As apical  
119 markers label only a part of the cell, the intensity projection (Umorin, 2006) of apical markers onto a 2D  
120 plane (for a tissue with a single layer of epithelial cells) is feasible and informative. Cell segmentation  
121 conducted on such projected images (Figure S1C(i), Methods) revealed the average apical area of wing  
122 disc columnar cells to be  $4.4 \pm 2.0 \mu\text{m}^2$  (Figure S1D). Additionally, spatial information can be retrieved  
123 from the depth map (or *z-depth* map) of maximum intensity of *E-Cadherin* that describes the contour of  
124 the reference apical surface: a smooth and continuous increase in *z-depth* is seen as we move away from  
125 the centre (Figure S1C(ii), Methods). Thus, the apical marker describes the outermost surface of cells  
126 embedded within the Euclidean 3D space.

127 The approach to studying 3D datasets becomes more complex when studying markers that label the entire  
128 apico-basal length of cells in a curved tissue. To analyse the 3D architecture of the epithelial cells, wing  
129 discs expressing the plasma membrane marker CAAX-GFP were evaluated (Figure 1B, Movie S1). On  
130 slicing through the sample from the top of the dome to the bottom, it is evident that the cell organisation  
131 is more complex than the apical surface alone. Orthogonal views of CAAX-GFP-labelled wing disc  
132 clearly show the tissue curvature along both the minor and major axes (Figure 1C). From these views, we  
133 also see that: (i) CAAX-GFP labels the entire length of the cells; (ii) cells are elongated along the vertical  
134 axis; (iii) cells are densely packed; and (iv) the tissue is pseudostratified with multiple cross-sectional cell  
135 shapes (Movies S2-S3). The 2D transverse section of flat or curved tissue with columnar epithelial cells  
136 usually has a single cell along any axis perpendicular to the surface. In this case of pseudostratified cells,  
137 multiple cell boundaries were encountered while moving along any axis perpendicular to the surface of  
138 each 2D transverse section (Figure 1D). This is unlike the orderly packed columnar epithelial cells  
139 previously observed in the early *Drosophila* embryo (Rupprecht *et al.*, 2017).

140 To study the cellular organisation of this pseudostratified epithelium, we quantified the area and  
141 orientation of cells in each axis view. The angle of cell orientation, defined as the angle between the long  
142 axis of the segmented cell with the vertical (Z) axis, is overlaid as a heatmap on the segmented cells  
143 (Figure 1D(ii), 1D(iii)). The cell orientation angles show that while the cells in the centre of the disc have  
144 lower orientation angles, cells in the periphery have larger deviations in their angles (Figure 1D(i)). The  
145 cells in the periphery are more tilted along the minor axis than along the major axis (Figure 1D(i)). While  
146 the transverse section measurements show a trend in cell position and cell orientation, the measurements  
147 have a limitation in that the cross-sectional view encompasses only a part of the entire cell and not the  
148 whole cell due to the curved pseudostratified nature of the epithelium. Cells within the pseudostratified  
149 disc proper tissue appear to be aligned perpendicular to the outermost surface.

#### 150 *Transforming 3D image datasets into laminar organisation from the outermost surface*

151 Simple 2D projections, like that for *E-Cadherin*, fail for CAAX-GFP or markers which label cells along  
152 the length of the apico-basal axis as such projections cannot describe clear cell boundaries, especially for  
153 a curved pseudostratified epithelium. It is therefore useful to transform the optical slices obtained along  
154 the axes defined by the imaging platform during data acquisition, into layers defined by the perpendicular  
155 distance from the outermost surface. In this section, we discuss the methodology used to perform this  
156 transformation with the steps outlined in Figure 2A and detailed in Methods.

157 In the process of confocal imaging, along with the tissue of interest (*i.e.*, disc proper cells), other tissues  
158 in the proximity, such as peripodial membrane and hinge cells, are inevitably captured. Peripodial cells  
159 are not at a constant distance away from the disc proper cells (see Figure S1B). Therefore, a simple Z  
160 shift is not sufficient to remove the peripodial layer of cells. To separate the tissue of interest from other  
161 tissues, masks were hand-drawn, and the outlines of the masks were smoothed (Figure 2B).  
162 Subsequently, the outlines of the masks were linearly interpolated to extract the apical-most surface,  $S$   
163 (Figure 2C, 2D). This point cloud  $S$  defines a curved 3D region. The distance of all points within the wing  
164 disc to the outermost surface,  $S$ , was computed next. The surface,  $S$ , was approximated to be a series of  
165 small line segments (piecewise linear chordal segments) (D'Errico, 2021). The Euclidean distance of each  
166 point  $P$  within the wing disc to these piecewise line segments was calculated. The minimum of this set  
167 was estimated as the distance  $D_{PP'}$ , with  $P'$  being the nearest point on  $S$ , for every  $P$  (Methods, Figure  
168 S2A). Using this method, each pixel within the tissue of interest could be categorised by its distance from  
169 the outermost surface.

170 Each isosurface at different distances from the outermost surface can be analysed to estimate intensity  
171 profiles of various fluorescently labelled markers or can be projected onto a 2D surface for visualisation  
172 of cell organisation along the apico-basal axis (Methods). An example of the projection of layers onto a  
173 2D surface is shown in Figure 2E and Movie S4. This 3D geometrical categorisation overcomes the  
174 problems of simple 2D planar projection observed for a curved pseudostratified epithelium. Such a  
175 transformation improves the visualisation of apical surfaces as distinct from basal surfaces. Unlike the  
176 confocal stacks, cells in the centre or periphery in the transformed planes are now at the same height. The  
177 framework outlined above provides a clear method for comparing cells at similar heights within the  
178 tissue, rather than by their distance to the (arbitrary) imaging plane. Using this methodology, any curved  
179 sample can be deconvolved into layers, equidistant from the outermost surface.

180 *Parameterising the dependence of sample geometry on fluorescence intensity*

181 Depth of imaging is limited in confocal microscopy (Jonkman *et al.*, 2020). A peculiarity which stands  
182 out in 3D datasets of curved samples imaged using confocal microscopy is the intensity gradient observed  
183 within each layer. Pseudo-coloured images of each layer of wing discs labelled with CAAX-GFP show an  
184 intensity gradient where the centre of the sample is brighter, with the intensity falling off gradually as we  
185 move away from this centre (Figure 3A). However, as CAAX-GFP is driven by a Ubiquitin promoter, the  
186 expectation is that all cells will have similar expression levels of CAAX-GFP. Moreover, on transforming  
187 the imaging data as layers from the outermost surface, each layer has information from cells at the same  
188 depth along the apico-basal axis. Therefore, each surface layer is expected to have similar distributions of  
189 intensities and the observed intensity variations are likely linked to the curvature-based artefacts.

190 What factors could contribute to an intensity gradient? In confocal microscopy, the signal levels are  
191 profoundly sensitive to scattering of excitation and emission light. We see that across wing discs, the  
192 intensity of CAAX-GFP reduces with sample depth (distance from the outermost surface, Figure S3A(i)).  
193 While scattering of light affects the recorded intensity, it alone cannot explain the variations in intensities  
194 observed within each layer (Figure 3A, S3Aii). The heterogeneity of intensities as measured by  
195 coefficient of variation of intensities is larger in the apical layers and reduces with increased sample depth  
196 (Figure S3A(ii)). To interrogate the sources of intensity variations within layers, we next measured the  
197 dependence of intensity on two factors related to sample geometry: imaging depth ( $z$ -depth) and the  
198 surface angle ( $\theta$ ) (Figure 3B). Imaging depth is defined as the vertical distance from the first imaging  
199 plane. Surface angle is defined as the included angle between the surface normal and the vertical  
200 illumination (Z) axis (Methods). Note that the surface angle is not the same as polar angle. The larger the  
201 angle  $\theta$ , the more oblique is the surface with respect to the illumination axis. Similar to a simulated hemi-  
202 ellipsoid (Figure S3B), points closer to the centre of the wing disc have small deviations in surface angles  
203 with respect to the illumination axis, while those in the periphery show larger deviations (Figure 3Ci,  
204 S3C). The CAAX-GFP intensity measured across wing discs reduces as the surface angle increases within  
205 each surface layer (Figure 3Cii). As expected for a hemi-ellipsoid (Figure S3B), points closer to the centre  
206 of the wing disc have lower  $z$ -depth values while those in the periphery show larger  $z$ -depths (Figure 3Di,  
207 S3C). A reduction in CAAX-GFP intensity was also observed with increasing imaging depth for each  
208 surface layer (Figure 3Dii). These observations indicate that scattering in combination with the curved  
209 sample architecture contribute to the observed intensity variations. The range of  $z$ -depths spanning the  
210 outermost apical layer is maximum and this range reduces in basal layers. This explains why the variation  
211 in observed intensities is highest in the apical layers and lower in deeper layers (Figure S3Aii).

212 Within curved tissues, if cells are aligned according to the curvature (Figure 1D), then the orientation of  
213 cells with respect to the imaging axis contributes to the curvature related artefacts in the recorded  
214 intensities. We provide a simple explanation for this in Supplementary Note 1. Consider a curved tissue  
215 with fluorescently labelled apical surface with surface angle  $\theta$  (Figure S4Ai). The average intensity of  
216 signal recorded from the curved tissue depends on the surface angle,  $\theta$  and the distance of the curved  
217 tissue from the recording plane,  $z_0$  (Equation 1, Figure S4Aii). We observe that the variation with surface  
218 angle is more pronounced if this curved tissue lies at a shorter distance from the recording plane. At larger  
219 distances, the contribution of reduction of intensity due to  $z$ -depth will be larger than the effect of cell  
220 orientation. In the above example, we considered a special case where only the apical surface of the cells  
221 is fluorescently labelled. However different biochemical reporters are localised to different organelles

222 within the cell volumes (Figure 5). To extend our understanding of the contribution of cell orientation in  
223 altering recorded intensities, we considered two extreme scenarios: one in which the molecules are  
224 localised to a thin narrow region within the cell (like the apical adherens junction markers in Figure  
225 S4B(i)); and another in which the molecules are spread across the volume of the cell (like the nucleus in  
226 Figure S4C(i)). On convolving these objects using a point spread function (Supplementary Note 1), we  
227 estimated the recorded intensity for each scenario (Figure S4B(ii), S4C(ii)). The effect of orientation on  
228 measured intensity matters more for markers localised to thin volumes compared to those distributed in  
229 broader volumes (Figure S4B(iii), S4C(iii)). In case of samples with dispersed marker localisations, with  
230 thickness greater than the  $z$ -resolution, the loss in intensity for any sample orientation is predominantly  
231 because of the  $z$ -depth. For narrower localisations, with thickness less than the  $z$ -resolution, both sample  
232 orientation and  $z$ -depth contribute to the recorded intensities. Our empirical observations combined with  
233 these theoretical considerations make clear that sample geometry with respect to the imaging axis causes  
234 the recorded intensity differences. While these issues have long been known, such considerations are not  
235 fully accounted for in most analyses of curved epithelia. The parameters defined above can be used to  
236 correct for such observed intensity differences, as we detail next.

### 237 *Accounting for the intensity changes due to curvature*

238 To correct the intensity differences, we constructed a data-based normalisation matrix using CAAX-GFP  
239 intensities as a reference. This is valid with the assumption that the differences observed in CAAX-GFP  
240 intensity are primarily due to the dependence of intensity on the above stated parameters (depth and  
241 orientation). Such a correction matrix allows for the comparison of any concentration profile to that of  
242 CAAX-GFP gradient and decouples the variation in fluorescence intensity from systematic variations  
243 observed due to scattering and sample geometry.

244 Different normalisation matrices were generated based on the following parameters: distance from the  
245 surface ( $d$ ),  $z$ -depth ( $z$ ) and/or surface angle ( $\theta$ ). We classified the normalisation matrices as either: depth-  
246 based normalisation matrix using ( $d$ ) and ( $z$ ) or curvature-based normalisation using ( $d$ ) and ( $\theta$ ) or 3D  
247 normalisation matrix using ( $d$ ,  $z$ ,  $\theta$ ) as parameters. These matrices were constructed using intensities from  
248 multiple wing discs labelled with CAAX-GFP (Methods, Figure 4A, S5A, S5B). An example of intensity  
249 distribution from multiple wing discs for the apical layer ( $d = 1$ ) is shown in Figure S5C. The mean of  
250 intensities belonging to each ( $d$ ,  $z$ ,  $\theta$ ) was used to construct the normalisation look-up-table (Figure 4A).  
251 Most of the  $z$  and  $\theta$  bins were populated by almost all wing disc samples, but we note that some  $z$  and  $\theta$   
252 bins were only populated by a few (owing to the surface geometry differences across samples). Overall,  
253 the normalisation matrix encompasses the effect of intensity changes for a wide range of orientations of  
254 the hemi-ellipsoidal sample.

255 For intensity correction, voxels within each wing disc defined by ( $d$ ,  $z$ ,  $\theta$ ) were corrected using a  
256 corresponding factor from the normalisation matrix. While both the 2D normalisations worked well in  
257 equalising the intensities across the entire disc, small deviations in intensities were seen with both depth-  
258 based and curvature-based normalisation (Figure 4B). A 3D normalisation matrix that included ( $d$ ,  $z$ ,  $\theta$ ) as  
259 parameters functioned the best in correcting the heterogeneities in the signal (Figure 4B, Movie S5).  
260 Unlike the symmetric hemi-ellipsoid, the  $z$ -depths and the surface angles are not symmetric for a wing  
261 disc (Figure S3B, S3C). Although closely related,  $z$  and  $\theta$  together better described the surface of a wing  
262 disc (Figure S3C). This approach is limited in correcting the intensity along the extreme edges of the

263 minor axis. This is likely due to the sharper curvature changes observed across the minor axis, more so  
264 than along the major axis. Fewer voxels are observed in the highest curvature areas, increasing the  
265 probability of having extreme values due to smaller sample size. Therefore, in all the quantifications  
266 below the sample extremities have been ignored. Using such a data-based normalisation methodology, the  
267 intensity differences brought about due to sample geometry can be accounted for within the limits  
268 mentioned above.

### 269 *Measuring 3D concentration profiles from the reference plane*

270 Concentration profiles of biomolecules within an epithelium are usually defined from a reference plane.  
271 Here, we defined the *Wg* morphogen producing cells as a reference plane. *Wg* is produced by a stripe of  
272 cells at the dorso-ventral boundary of the wing disc. The production domain was approximated to be the  
273 best-fit plane,  $Q$ , passing through the points of high intensity in each slice (red plane in [Figure 2D](#)) and  
274 the perpendicular plane,  $R$  (yellow plane in [Figure 2D](#)), is defined with respect to  $Q$ . Distances  $D_{PQ}$  and  
275  $D_{PR}$ , the shortest distance of each point,  $P$ , within the wing disc to the production plane,  $Q$ , and  
276 perpendicular plane,  $R$ , was measured ([Methods](#)). [Figure S2B](#) illustrates points within the wing disc  
277 divided into several bins based on the distance from the production plane or distance from the  
278 perpendicular plane. Estimating concentration profiles across the production plane using  $D_{PQ}$  bins  
279 demonstrates how concentration changes as a function of distance from producing cells. Comparing the  
280 concentration profiles within  $D_{PR}$  bins provides some understanding on the variability of concentration  
281 gradients within each wing disc.

282 Towards quantifying the intensity as a function of distance from producing cells, each disc was first  
283 divided into five layers using distance from the outermost surface ( $D_{PP'}$ ). Subsequently, each layer was  
284 further divided into thirty bins as a function of distance from producing cells ( $D_{PQ}$ ). Mean intensities  
285 within each bin were calculated ([Methods](#)). All intensities were normalised by the intensity of in the  
286 apical-most bin closest to the production plane to facilitate comparison across multiple samples. [Figure](#)  
287 [5A\(iii\)](#) shows a representative output of normalised intensity of CAAX-GFP as a function of distance  
288 from producing cells and along apico-basal axis. Without correction, we observe a decrease in intensity of  
289 CAAX-GFP as a function of distance from producing cells ([Figure 5A\(iii\)](#)). Corrected intensity shows a  
290 uniform profile of CAAX-GFP, confirming that the correction code works ([Figure 5A\(iv\)](#)). Correction  
291 also helps in reducing the intensity variability observed within each apico-basal layer, allowing an  
292 understanding of the actual variation in concentration profiles (Compare [Figure S3A\(ii\)](#) and [S5D](#)).

293 Our 3D analysis was next applied to other samples, such as wing discs labelled with *E-Cadherin*, *Rab7*  
294 and *Wg*. While the uncorrected layers of an example disc expressing *E-Cadherin* shows heterogenous  
295 intensities, with the centre being brighter than the periphery, the corrected layers show a near-  
296 homogenous distribution of *E-Cadherin* signal ([Figure S6A](#)). *E-Cadherin* is slightly elevated next to *Wg*  
297 producing cells. While the raw plot shows a gradual decay of *E-Cadherin* intensity as a function of  
298 distance from producing cells, in the corrected wing discs the intensity of *E-Cadherin* expression remains  
299 nearly constant. This indicates that the decay observed in unprocessed imaging data is primarily due to  
300 intensity artefacts and that *E-Cadherin* levels do not decrease away from *Wg* producing cells ([Figure 5B](#)).

301 Rab GTPases along with their effectors, coordinate vesicle trafficking functions such as formation of  
302 vesicles, fusion of vesicles, directing vesicles to target membranes (reviewed in (Caviglia *et al.*, 2019)). In



303 wing discs, many Rab proteins are apically enriched. YFP protein trap lines of Rabs showed that those  
304 involved in secretion (*Rabs 1, 2, 6, 8*) and those involved in endocytosis (*Rabs 4, 5, 7, 11*) are targeted to  
305 apical hub (Dunst *et al.*, 2015). Gaining accurate profiles of these endocytic Rab proteins is important as  
306 they have consequence in establishing and maintaining morphogen gradients (Wg, Dpp, reviewed in  
307 (Gonzalez-Gaitan and Julicher, 2014)). Here, we elucidate the 3D concentration profile of *Rab7-eYFP*  
308 (Figure S6B(i)). *Rab7-eYFP* shows apical enrichment (Figure 5C(i), 5C(ii)). While the uncorrected *Rab7*  
309 concentration profile shows a gradual decay from the producing cells (Figure 5C(iii)), the intensity  
310 corrected *Rab7* shows little gradient across the sample (Figure 5C(iv)). Once again, the differences  
311 observed in the uncorrected samples is primarily due to intensity artefacts.

312 The morphogen *Wg* forms a gradient across the dorso-ventral axis of the wing disc (Neumann and Cohen,  
313 1997). Endogenously tagged *Wg-GFP* (Port *et al.*, 2014) shows that *Wg* is enriched in the producing cells  
314 (Figure 5D(i), 5D(ii)). Separating *Wg-GFP* into layers shows that *Wg-GFP* is enriched at the producing  
315 cells across all layers along the whole apico-basal axis (Figure S6B(ii)). Measuring the average profile of  
316 *Wg-GFP* demonstrates that both uncorrected and corrected intensities show a steep decaying curve from  
317 the producing cells (Figure 5D(iii), 5D(iv)), consistent with previous overexpression studies (Kicheva *et*  
318 *al.*, 2007).

319 We next evaluated the nuclei profiles within the wing disc. The nucleus is localised in more basal layers  
320 (Figure 5E(i), 5E(ii), Movie S6). This is also detected in the quantification, wherein the intensity (of  
321 DAPI) in the second layer is more than the intensity recorded in the apical-most layer. We observe that  
322 nuclei in cells next to the *Wg* producing cells are localised further away from the apical-most surface  
323 (Figure S6B(iii)). The quantification also reflects a dip in intensity right next to the *Wg* producing cells in  
324 the apical two layers (Figure 5E(iii)). The corrected intensity for nuclear signal corrects the tissue  
325 geometry related decay in intensity observed in cells away from the producing cells (Figure 5E(iv)).

326 The examples discussed above indicate the necessity of applying intensity correction for an accurate  
327 quantification of markers. As the apical layers show the highest variation in intensity in unprocessed  
328 images, intensity correction is especially required for quantification of markers localised to apical layers.  
329 Additionally, the effect of correction is more prominent for markers which are localised to cells in the  
330 centre as well as periphery of the wing disc. The method described here helps in quantifying  
331 concentration gradients in 3D, while keeping in consideration the shape of the tissue.

### 332 *Elucidating 3D organisation of cells within the curved epithelium of wing discs*

333 Rearranging the image datasets from microscope reference to the sample surface coordinates has several  
334 advantages. In this section, we utilise this method to describe the challenging task of understanding the  
335 3D organisation of cells within a curved pseudostratified epithelium. Although the apical arrangement of  
336 cells is widely considered to be a proxy for 3D organisation of cells, a detailed description of the cell  
337 shape along the apico-basal axis is necessary to appreciate the physical principles of cell packing.  
338 Pseudostratified epithelia are a special kind of epithelia wherein the nuclear packing density is very high.  
339 This forces the cells to have staggered nuclear distribution with respect to their neighbours (Kirkland *et*  
340 *al.*, 2020; Hecht *et al.*, 2022), necessitating morphometric quantifications of cell shape along the apico-  
341 basal axis. In the wing discs, we observe that the 3D organisation of cells is highly complex. Examples of  
342 reconstructed cells (Methods) of this pseudostratified epithelium reveal a plethora of shapes (Figure 6A).

343 Using k-means clustering (Methods), these shapes can be clustered into three categories based on the  
344 cross-sectional area changes along the apico-basal axis: cells tapered towards the basal surface (Inverted  
345 Bowling Pin); cells bulged towards the basal surface (Bowling Pin); or cells bulged in the centre with  
346 tapered apical and basal surfaces (Rolling Pin) (Figure 6B). The apical area alone cannot describe the 3D  
347 shape as all three groups have similar apical areas (Figure 6B).

348 Other than the three categories of cells described above, a fourth category encompasses dividing cells. A  
349 conserved feature of metazoan cell division is change in cell shape, with cells rounding up before the  
350 mitotic spindle assembly and reverting to the resting state shape after cytokinesis (reviewed in (Cadart *et*  
351 *al.*, 2014)). Similarly in the wing disc, dividing cells are found in the apical part of the epithelium, which  
352 has a larger cross-sectional area (Figure 6Ci) (Meyer, Ikmi and Gibson, 2011). The 3D view of dividing  
353 cells shows dramatic apical translocation, and these cells are observed within 5-6  $\mu\text{m}$  depths from the  
354 apical surface. Additionally, the shapes of neighbouring cells are transformed to accommodate dividing  
355 cells by occupying the volume beneath (Figure 6Cii).

### 356 *Evaluating neighbour exchanges along the apico-basal axis*

357 To further understand the details of cell organisation, we segmented 327 cells and measured cross-  
358 sectional area changes along the apico-basal axis (Methods). The cell arrangement of cells on the apical  
359 surfaces is more uniform, with a tight distribution of apical area (Figure 7Ai, 7Aii). The distribution of  
360 cross-sectional area becomes broader and bimodal along the basal surfaces (Figure 7Aii). On the basal  
361 side, cells have both larger and smaller cross-sectional areas compared to the apical areas, as expected  
362 from the observed cell shapes of the pseudostratified tissue. Within each basal surface, cells with smaller  
363 cross-sectional areas are constricted while those with larger areas form a bulge. The coefficient of  
364 variation of cross-sectional area increases from apical to basal surfaces.

365 At all depths, the average number of neighbours per cell is six (Figure 7Bi). However, the frequency  
366 distribution of neighbour numbers on the apical and the basal sides are not identical, suggesting that the  
367 neighbour relationships could change along the apico-basal axis (Figure 7Bi). Indeed, on an average, cells  
368 have eight unique neighbours (Figure 7Bii, 7Ci). We even observed cells with 11 different neighbours  
369 along their apico-basal axis. As a result of having many neighbours, cells are in direct physical contact  
370 not only with the cells which are neighbours on the apical side but even with cells that appear to be two  
371 cell diameters away on the apical side (Figure 7Cii).

372 How are these cells then packed? We observe that some cells which are neighbours on the apical surface  
373 separate along the basal surface, allowing those which were not neighbours on the apical to intercalate  
374 along the medial or basal planes (Figure 7D). These neighbour exchanges, called pseudo-T1s or apico-  
375 basal intercalations, are frequently observed along the apico-basal axis. On an average, four such  
376 neighbour exchanges can be seen for each cell along the apico-basal axis (Figure 7E). The neighbour  
377 exchanges also positively correlate with the cross-sectional area changes. An increase in cross-sectional  
378 area results in an increase in the number of neighbours and vice versa (Figure 7F). The variability in  
379 cross-sectional areas along the apico-basal axis is a key determinant in defining the neighbours. The  
380 methods detailed here can be used to further explore the dynamics of cell shape changes within complex  
381 tissue architectures, during growth accompanied by cell divisions and cell death.

## 382 Discussion:

383 Studying cell fates and cellular organisation within curved tissues in 3D has long been a challenging  
384 problem. Quantitative analysis of fluorescently labelled curved tissues entails a comprehensive  
385 understanding of the interaction of light (imaging) with matter (tissue). This requires a systematic  
386 deconstruction of the tissue morphology into tailored geometric coordinates, considering the sample  
387 morphology, the imaging modality and reference imaging axes. Using the first principles-based  
388 methodology described here, the transformation of high-resolution confocal images planes from the frame  
389 of reference of the optical axis of the microscope into a laminar organisation with respect to the outermost  
390 sample surface, provides access to detailed quantitative analysis. Our data-based intensity correction  
391 procedure, which corrects the intensity variations brought about by sample geometry, provides a coherent  
392 method for evaluating the intensity distribution of biochemical signals in apical and basal layers. In  
393 addition, this type of transformation permits the detailing of cell shape and cell-packing within curved  
394 tissues. The morphometric measurements have important consequences for understanding the physical  
395 principles of cell packing as well as the generation of biochemical cues in the form of gradients or fields.

396 Defining the physical principles of cell packing is key to understanding the formation of curved tissue.  
397 Our careful approach accounting for tissue geometry has uncovered distinct cell shapes of cells within the  
398 pseudostratified epithelium of the *Drosophila* wing disc. Based on the area changes as a function of  
399 apico-basal axis, cells were clustered into three categories. These various cell shapes could be formed due  
400 to high nuclear densities. Interkinetic nuclear migration is a feature of pseudostratified cells (Strzyz,  
401 Matejic and Norden, 2016). In vertebrate pseudostratified neuroepithelium, nuclear migration is initiated  
402 during G2 stage (Norden *et al.*, 2009; Baffet, Hu and Vallee, 2015). In contrast, in the pseudostratified  
403 epithelium of *Drosophila*, the movement of nucleus to the apical surface is observed just prior to the M  
404 phase (Mandaravally Madhavan and Schneiderman, 1977; Gibson *et al.*, 2006; Kirkland *et al.*, 2020;  
405 Hecht *et al.*, 2022). During other phases of the cell cycle, there is no concomitant match between the  
406 location of the nucleus and the cell cycle stage (Meyer, Ikmi and Gibson, 2011). As shown here, the  
407 dividing cells are apically translocated, while the surrounding neighbours occupy the volume beneath  
408 dividing cells. It would be interesting to evaluate how neighbours undergo shape changes during cell  
409 division events, while keeping the tissue intact along both apical and basal surfaces.

410 Given the challenges in visualising cells in 3D, most studies have focussed on understanding cell  
411 neighbour relationships using apical markers (Baena-López, Baonza and García-Bellido, 2005; Classen *et*  
412 *al.*, 2005; Gibson *et al.*, 2006; Aigouy *et al.*, 2010). However, the apical arrangement need not be a proxy  
413 for cell organisation along the apico-basal extent of the tissue. In fact, we find that although  
414 predominantly hexagonal cells are found along all layers across the apico-basal axis in disc proper cells,  
415 the number of unique neighbours per cell is more than those present at the apical side. Neighbour  
416 exchanges through apico-basal intercalations have been observed previously in columnar cells (Rupprecht  
417 *et al.*, 2017; Sun *et al.*, 2017; Gómez-Gálvez *et al.*, 2018). However, the frequency of such intercalations  
418 is much higher for pseudostratified cells as shown here for wing disc (~4 transitions per cell) and recently  
419 reported in mouse embryonic explants (~5 transitions per tube cell) (Gómez *et al.*, 2021) compared to  
420 simple columnar cells. Correlation between apico-basal cross-sectional area changes and neighbour  
421 changes (as shown here and recently reported in cells of mouse explants (Gómez *et al.*, 2021)) indicates  
422 that the driving force for cell shape is a key determinant in neighbour relations. Pseudostratified epithelia  
423 are often seen as organ precursors and are highly proliferative tissues (reviewed in (Norden, 2017)).

424 Given the dynamic nature of the tissue, it would be exciting to next understand the temporal frequencies  
425 of apico-basal cell intercalations and how such interactions contribute towards cell-cell juxtacrine  
426 signalling.

427 Finally, the interpretation of concentration profiles of biochemical signals is key for understanding cell  
428 fate specifications. Morphogen gradients, which provide positional information during development, have  
429 been extensively studied (reviewed in (Tabata and Takei, 2004)). Considerations in image acquisition and  
430 image analysis are essential to quantitatively estimate morphogen concentrations at different positions.  
431 Our quantification now provides detailed estimation of concentration gradients within a curved tissue  
432 where cell co-ordinates along the apico-basal, anterior-posterior, and dorso-ventral axis are clearly  
433 classified. This allows estimating apical, medial, and basal concentration profiles across the dorso-ventral  
434 axis (considering *Wg* as a reference plane as considered here), as well as assessing the extent of variability  
435 in morphogen gradients (Iyer *et al.*, 2022). The method can also be applied to estimate concentration  
436 profiles across the anterior-posterior axis by considering *Dpp* producing cells as a reference plane. As  
437 described here, fluorescence intensity variations due to scattering linked to sample geometry is maximally  
438 seen for outer layers of a curved epithelium. The intensity variations due to sample geometry should be  
439 deconvolved to determine biologically relevant concentration profiles. Apically localised morphogens  
440 will therefore be subject to such imaging artefacts and careful evaluation of the sample geometry with the  
441 imaging frame of reference is needed to extract the (near) accurate profiles of varying biochemical  
442 signals. The methods described here will undoubtedly serve to accurately delineate morphogen  
443 distributions, necessary for understanding the mechanisms behind the role of biochemical and mechanical  
444 cues in building 3D tissues.

#### 445 **References:**

446 Aigouy, B. *et al.* (2010) ‘Cell Flow Reorients the Axis of Planar Polarity in the Wing Epithelium of  
447 *Drosophila*’, *Cell*, 142(5), pp. 773–786. doi: 10.1016/J.CELL.2010.07.042.

448 Baena-López, L. A., Baonza, A. and García-Bellido, A. (2005) ‘The Orientation of Cell Divisions  
449 Determines the Shape of *Drosophila* Organs’, *Current Biology*, 15(18), pp. 1640–1644. doi:  
450 10.1016/J.CUB.2005.07.062.

451 Baffet, A. D., Hu, D. J. and Vallee, R. B. (2015) ‘Cdk1 Activates Pre-mitotic Nuclear Envelope Dynein  
452 Recruitment and Apical Nuclear Migration in Neural Stem Cells’, *Developmental Cell*, 33(6), pp. 703–  
453 716. doi: 10.1016/J.DEVCEL.2015.04.022.

454 Bertet, C., Sulak, L. and Lecuit, T. (2004) ‘Myosin-dependent junction remodelling controls planar cell  
455 intercalation and axis elongation’, *Nature*, 429(6992), pp. 667–671. doi: 10.1038/NATURE02590.

456 Blasse, C. *et al.* (2017) ‘PreMosa: extracting 2D surfaces from 3D microscopy mosaics.’, *Bioinformatics*  
457 (*Oxford, England*). Edited by R. Murphy, 33(16), pp. 2563–2569. doi: 10.1093/bioinformatics/btx195.

458 Cadart, C. *et al.* (2014) ‘Exploring the function of cell shape and size during mitosis’, *Developmental cell*,  
459 29(2), pp. 159–169. doi: 10.1016/J.DEVCEL.2014.04.009.

460 Caviglia, S. *et al.* (2019) ‘Rabs on the fly: Functions of Rab GTPases during development.’, *Small*  
461 *GTPases*, 10(2), pp. 89–98. doi: 10.1080/21541248.2017.1279725.

- 462 Classen, A. K. *et al.* (2005) ‘Hexagonal Packing of *Drosophila* Wing Epithelial Cells by the Planar Cell  
463 Polarity Pathway’, *Developmental Cell*, 9(6), pp. 805–817. doi: 10.1016/J.DEVCEL.2005.10.016.
- 464 Corson, F. *et al.* (2017) ‘Self-organized Notch dynamics generate stereotyped sensory organ patterns in  
465 *Drosophila*.’, *Science (New York, N.Y.)*, 356(6337). doi: 10.1126/science.aai7407.
- 466 D’Errico, J. (2021) *distance2curve - File Exchange - MATLAB Central*. Available at:  
467 <https://www.mathworks.com/matlabcentral/fileexchange/34869-distance2curve> (Accessed: 18 September  
468 2021).
- 469 Devenport, D. and Fuchs, E. (2008) ‘Planar polarization in embryonic epidermis orchestrates global  
470 asymmetric morphogenesis of hair follicles’, *Nature Cell Biology* 2008 10:11, 10(11), pp. 1257–1268.  
471 doi: 10.1038/ncb1784.
- 472 Dunst, S. *et al.* (2015) ‘Endogenously Tagged Rab Proteins: A Resource to Study Membrane Trafficking  
473 in *Drosophila*’, *Developmental Cell*, 33(3), p. 351. doi: 10.1016/J.DEVCEL.2015.03.022.
- 474 Durrieu, L. *et al.* (2018) ‘Bicoid gradient formation mechanism and dynamics revealed by protein lifetime  
475 analysis’, *Molecular Systems Biology*, 14(9), p. e8355. doi: 10.15252/MSB.20188355.
- 476 Dye, N. A. *et al.* (2017) ‘Cell dynamics underlying oriented growth of the *Drosophila* wing imaginal  
477 disc’, *Development*, 144(23), pp. 4406–4421. doi: 10.1242/dev.155069.
- 478 Erguvan, Ö. *et al.* (2019) ‘ImageJ SurfCut: a user-friendly pipeline for high-throughput extraction of cell  
479 contours from 3D image stacks’, *BMC Biology* 2019 17:1, 17(1), pp. 1–12. doi: 10.1186/S12915-019-  
480 0657-1.
- 481 Forster, B. *et al.* (2004) ‘Complex wavelets for extended depth-of-field: A new method for the fusion of  
482 multichannel microscopy images’, *Microscopy Research and Technique*, 65(1–2), pp. 33–42. doi:  
483 10.1002/jemt.20092.
- 484 Gibson, M. C. *et al.* (2006) ‘The emergence of geometric order in proliferating metazoan epithelia’,  
485 *Nature* 2006 442:7106, 442(7106), pp. 1038–1041. doi: 10.1038/nature05014.
- 486 Gómez-Gálvez, P. *et al.* (2018) ‘Scutoids are a geometrical solution to three-dimensional packing of  
487 epithelia’, *Nature Communications* 2018 9:1, 9(1), pp. 1–14. doi: 10.1038/s41467-018-05376-1.
- 488 Gómez-Gálvez, P. *et al.* (2021) ‘The complex three-dimensional organization of epithelial tissues’,  
489 *Development*, 148(1). doi: 10.1242/dev.195669.
- 490 Gómez, H. F. *et al.* (2021) ‘3D cell neighbour dynamics in growing pseudostratified epithelia’, *eLife*, 10.  
491 doi: 10.7554/ELIFE.68135.
- 492 Gonzalez-Gaitan, M. and Julicher, F. (2014) ‘The Role of Endocytosis during Morphogenetic Signaling’,  
493 *Cold Spring Harbor Perspectives in Biology*, 6(7), pp. a016881–a016881. doi:  
494 10.1101/cshperspect.a016881.
- 495 Gregor, T. *et al.* (2007) ‘Stability and nuclear dynamics of the bicoid morphogen gradient.’, *Cell*, 130(1),  
496 pp. 141–52. doi: 10.1016/j.cell.2007.05.026.
- 497 Guillot, C. and Lecuit, T. (2013) ‘Mechanics of Epithelial Tissue Homeostasis and Morphogenesis’,

- 498 *Science*, 340(6137), pp. 1185–1189. doi: 10.1126/SCIENCE.1235249.
- 499 Hamant, O. and Saunders, T. E. (2020) ‘Shaping Organs: Shared Structural Principles Across Kingdoms’,  
500 *Annual Review of Cell and Developmental Biology*, 36(1), pp. 385–410. doi: 10.1146/annurev-cellbio-  
501 012820-103850.
- 502 Hecht, S. *et al.* (2022) ‘Mechanical constraints to cell-cycle progression in a pseudostratified epithelium’,  
503 *Current Biology*, 32(9), pp. 2076-2083.e2. doi: 10.1016/J.CUB.2022.03.004.
- 504 Heemskerk, I. and Streichan, S. J. (2015) ‘Tissue Cartography: Compressing Bio-Image Data by  
505 Dimensional Reduction’, *Nature methods*, 12(12), p. 1139. doi: 10.1038/NMETH.3648.
- 506 Iyer, K. S. *et al.* (2022) ‘Cellular compartmentalisation and receptor promiscuity as a strategy for accurate  
507 and robust inference of position during morphogenesis’, *bioRxiv*, p. 2022.03.30.486187. doi:  
508 10.1101/2022.03.30.486187.
- 509 Jonkman, J. *et al.* (2020) ‘Tutorial: guidance for quantitative confocal microscopy’, *Nature Protocols*  
510 *2020 15:5*, 15(5), pp. 1585–1611. doi: 10.1038/s41596-020-0313-9.
- 511 Keller, P. J. (2013) ‘Imaging Morphogenesis: Technological Advances and Biological Insights’, *Science*,  
512 340(6137). doi: 10.1126/SCIENCE.1234168.
- 513 Kicheva, A. *et al.* (2007) ‘Kinetics of morphogen gradient formation.’, *Science (New York, N.Y.)*,  
514 315(5811), pp. 521–5. doi: 10.1126/science.1135774.
- 515 Kirkland, N. J. *et al.* (2020) ‘Tissue Mechanics Regulate Mitotic Nuclear Dynamics during Epithelial  
516 Development’, *Current Biology*, 30. doi: 10.1016/j.cub.2020.04.041.
- 517 Krzic, U. *et al.* (2012) ‘Multiview light-sheet microscope for rapid in toto imaging’, *Nature Methods*  
518 *2012 9:7*, 9(7), pp. 730–733. doi: 10.1038/nmeth.2064.
- 519 Lecuit, T. and Lenne, P. F. (2007) ‘Cell surface mechanics and the control of cell shape, tissue patterns  
520 and morphogenesis’, *Nature Reviews Molecular Cell Biology 2007 8:8*, 8(8), pp. 633–644. doi:  
521 10.1038/nrm2222.
- 522 Lemke, S. B. and Nelson, C. M. (2021) ‘Dynamic changes in epithelial cell packing during tissue  
523 morphogenesis’, *Current Biology*, 31(18), pp. R1098–R1110. doi: 10.1016/j.cub.2021.07.078.
- 524 Mandaravally Madhavan, M. and Schneiderman, H. A. (1977) ‘Histological analysis of the dynamics of  
525 growth of imaginal discs and histoblast nests during the larval development of *Drosophila melanogaster*’,  
526 *Wilhelm Roux’s Archives of Developmental Biology*, 183(4), pp. 269–305. doi: 10.1007/BF00848459.
- 527 Manning, L. A. *et al.* (2015) ‘Tissue landscape alters adjacent cell fates during *Drosophila* egg  
528 development’, *Nature Communications 2015 6:1*, 6(1), pp. 1–12. doi: 10.1038/ncomms8356.
- 529 Martin, A. C., Kaschube, M. and Wieschaus, E. F. (2009) ‘Pulsed actin-myosin network contractions  
530 drive apical constriction’, *Nature*, 457(7228), p. 495. doi: 10.1038/NATURE07522.
- 531 Meyer, E. J., Ikmi, A. and Gibson, M. C. (2011) ‘Interkinetic Nuclear Migration Is a Broadly Conserved  
532 Feature of Cell Division in Pseudostratified Epithelia’, *Current Biology*, 21(6), pp. 485–491. doi:  
533 10.1016/J.CUB.2011.02.002.

- 534 Müller, P. *et al.* (2013) ‘Morphogen transport.’, *Development (Cambridge, England)*, 140(8), pp. 1621–  
535 38. doi: 10.1242/dev.083519.
- 536 Munjal, A. *et al.* (2015) ‘A self-organized biomechanical network drives shape changes during tissue  
537 morphogenesis’, *Nature* 2015 524:7565, 524(7565), pp. 351–355. doi: 10.1038/nature14603.
- 538 Neumann, C. J. and Cohen, S. M. (1997) ‘Long-range action of Wingless organizes the dorsal-ventral  
539 axis of the *Drosophila* wing.’, *Development (Cambridge, England)*, 124(4), pp. 871–80.
- 540 Norden, C. *et al.* (2009) ‘Actomyosin Is the Main Driver of Interkinetic Nuclear Migration in the Retina’,  
541 *Cell*, 138(6), pp. 1195–1208. doi: 10.1016/J.CELL.2009.06.032.
- 542 Norden, C. (2017) ‘Pseudostratified epithelia - cell biology, diversity and roles in organ formation at a  
543 glance’, *Journal of cell science*, 130(11), pp. 1859–1863. doi: 10.1242/JCS.192997.
- 544 Park, S. *et al.* (2017) ‘Tissue-scale coordination of cellular behaviour promotes epidermal wound repair in  
545 live mice’, *Nature Cell Biology* 2017 19:3, 19(3), pp. 155–163. doi: 10.1038/ncb3472.
- 546 Port, F. *et al.* (2014) ‘Optimized CRISPR/Cas tools for efficient germline and somatic genome  
547 engineering in *Drosophila*’, *Proceedings of the National Academy of Sciences of the United States of*  
548 *America*, 111(29), p. E2967. doi: 10.1073/PNAS.1405500111/-/DCSUPPLEMENTAL.
- 549 Rauzi, M. *et al.* (2015) ‘Embryo-scale tissue mechanics during *Drosophila* gastrulation movements’,  
550 *Nature Communications* 2015 6:1, 6(1), pp. 1–12. doi: 10.1038/ncomms9677.
- 551 Ribeiro, C., Neumann, M. and Affolter, M. (2004) ‘Genetic control of cell intercalation during tracheal  
552 morphogenesis in *Drosophila*.’, *Current biology: CB*, 14(24), pp. 2197–207. doi:  
553 10.1016/j.cub.2004.11.056.
- 554 Rodriguez-Boulan, E. and Macara, I. G. (2014) ‘Organization and execution of the epithelial polarity  
555 programme’, *Nature Reviews Molecular Cell Biology*, 15(4), pp. 225–242. doi: 10.1038/nrm3775.
- 556 Rupprecht, J. F. *et al.* (2017) ‘Geometric constraints alter cell arrangements within curved epithelial  
557 tissues’, *Molecular biology of the cell*, 28(25), pp. 3582–3594. doi: 10.1091/MBC.E17-01-0060.
- 558 Shyer, A. E. *et al.* (2013) ‘Villification: How the gut gets its villi’, *Science*, 342(6155), pp. 212–218. doi:  
559 10.1126/SCIENCE.1238842.
- 560 Streichan, S. J. *et al.* (2018) ‘Global morphogenetic flow is accurately predicted by the spatial distribution  
561 of myosin motors’, *eLife*, 7. doi: 10.7554/ELIFE.27454.
- 562 Strzyz, P. J., Matejic, M. and Norden, C. (2016) ‘Heterogeneity, Cell Biology and Tissue Mechanics of  
563 Pseudostratified Epithelia: Coordination of Cell Divisions and Growth in Tightly Packed Tissues’,  
564 *International Review of Cell and Molecular Biology*, 325, pp. 89–118. doi:  
565 10.1016/BS.IRCMB.2016.02.004.
- 566 Sun, Z. *et al.* (2017) ‘Basolateral protrusion and apical contraction cooperatively drive *Drosophila* germ-  
567 band extension’, *Nature cell biology*, 19(4), pp. 375–383. doi: 10.1038/NCB3497.
- 568 Tabata, T. and Takei, Y. (2004) ‘Morphogens, their identification and regulation’, *Development*, 131(4),  
569 pp. 703–712. doi: 10.1242/dev.01043.

570 Tepass, U. *et al.* (1996) ‘shotgun encodes *Drosophila* E-cadherin and is preferentially required during cell  
571 rearrangement in the neurectoderm and other morphogenetically active epithelia’, *Genes & development*,  
572 10(6), pp. 672–685. doi: 10.1101/GAD.10.6.672.

573 Umorin, M. (2006) *Stack Focuser*. Available at: <https://imagej.nih.gov/ij/plugins/stack-focuser.html>  
574 (Accessed: 19 September 2021).

575 Yaron, T., Cordova, Y. and Sprinzak, D. (2014) ‘Juxtacrine Signaling Is Inherently Noisy’, *Biophysical*  
576 *Journal*, 107(10), p. 2417. doi: 10.1016/J.BPJ.2014.10.006.

### 577 **Acknowledgements:**

578 We thank JP Vincent (Crick Institute, UK) for sharing Wg-GFP flies. We thank the Central Imaging and  
579 Flow Cytometry Facility (CIFF) for imaging. We acknowledge Thomas Lecuit, Kabir Hussain, Subhash  
580 Sadhu, Sivaramakrishnan Swaminathan and members of Mayor laboratory for discussions related to this  
581 project. CP acknowledges NCBS-TIFR graduate fellowship and Company of Biologists’ Travelling  
582 Fellowship. SM acknowledges J.C. Bose Fellowship from SERB-DST, Government of India, and India  
583 Alliance DBT – Wellcome Trust Margdarshi fellowship (IA/M/15/1/502018). MR and SM acknowledge  
584 support from the Department of Atomic Energy (India), under project no. RTI4006. MR acknowledges  
585 support from the Simons Foundation (Grant No. 287975) and acknowledges the award of JC Bose  
586 Fellowship from SERB-DST, India. The work in the lab of TES was funded by a NRF Fellowship  
587 NRF2012NRF-NRFF001-094, core funding from the Mechanobiology Institute, National University of  
588 Singapore and start-up support from Warwick Medical School, University of Warwick.

### 589 **Author Contributions:**

590 CP, SM, TES conceived the study. CP conducted the experiments. CP and TES worked on the analysis  
591 pipeline. CP analysed the experimental data. KSI, MR conducted the theoretical analysis. CP, SM and  
592 TES wrote the manuscript with inputs from KSI and MR.

### 593 **Conflicts of Interest:**

594 The authors declare no conflicts of interest.



595 **Main Figure Legends:**

596 *Figure 1: Orientation of cells within the curved epithelium of wing disc*

597 A: Schematic representation of the three-dimensional wing imaginal disc. Y axis (major axis) represents  
598 the *Wg* producing cells, X axis (minor axis) represents cells at increasing distance from the producing  
599 cells, Z axis represents the depth of the cells. Expression domains of key signalling molecules (*Wg*, *Dpp*  
600 and *Hh*) and fate map (Notum, Hinge, Wing Blade) are also indicated.

601 B: Z sections of *CAAX-GFP* expressing wing imaginal disc. The different Z sections (1-4) show that each  
602 plane has information about cells at different heights. For example, the rim of (4) has cells with smaller  
603 apical area, while the central region shows cells with larger medial/basal area of the pseudostratified  
604 epithelium.

605 C: Orthogonal views of wing disc labelled with *CAAX-GFP* (cyan) and *Wg* (magenta) shows curvature  
606 along both minor and major axis of the wing disc. The red arrow marks the section represented in XY,  
607 YZ, XZ projection.

608 D: Segmentation of transverse section of wing disc XZ (ii) and YZ (iii) helps in estimating the angle of  
609 orientation of cells (i). The heat map in ii and iii show that cells along the periphery are more tilted with  
610 respect to the vertical illumination axis (Z) compared to the cells in the centre. The cell orientation  
611 quantification shown in (i) describes that the cells are tilted away from the centre (shaded orange) across  
612 both axes. Cells are more tilted away from the centre across the minor axis (XZ) than the major axis (YZ).  
613 Colours in the plot in (i) represent different transverse slices. Number of cells: 628 cells from 7 transverse  
614 slices (XZ) and 690 cells from 6 transverse slices (YZ) from 2 samples. On an average, the 2D cross-  
615 sectional orientation of cells in XZ and YZ is  $14.7 \pm 12.2^\circ$  and  $12.6 \pm 10.1^\circ$  (mean  $\pm$  sd) respectively.

616 Scale bar: 50  $\mu$ m

617 *Figure 2: Workflow to reorganise 3D image data as layers with respect to the outermost surface*

618 A-E: The workflow to restructure 3D image data into laminar organisation with respect to the outermost  
619 surface is summarised in A and output is shown in E. The binary mask of the tissue of interest (blue  
620 overlay in B) is smoothed and interpolated to define a point cloud describing the outermost surface of  
621 wing disc (C, D). The *Wg* production plane (red) and the perpendicular plane (yellow) is defined for each  
622 wing disc. For any evaluation voxel inside the 3D image stack, the shortest distance from the surface (*d*)  
623 was computed to organise the 3D image data as layers with respect to the outermost surface. E: Projection  
624 of each layer of *CAAX-GFP* labelled wing disc moving inwards from the outermost surface as described  
625 in the schematic. Each layer is 0.5  $\mu$ m thick. See Methods for more information. Scale Bar: 50  $\mu$ m.

626 *Figure 3: Imaging and sample geometry parameters affecting intensity within the curved epithelium of*  
627 *wing disc*

628 A: Pseudo-coloured projection images of each layer of *CAAX-GFP* labelled wing disc moving inwards  
629 from the outermost surface as described in the schematic. Each layer is 0.5  $\mu$ m thick. See Methods for  
630 more information. This figure is related to Movie S4 and Fig 2E. Scale Bar: 20  $\mu$ m.

631 B: Schematic describing sample geometry parameters: imaging depth ( $z$  depth) and surface angle ( $\theta$ )

632 C-D: Normalised intensity (Intensity/Mean Intensity) expressing CAAX-GFP shows that intensity  
633 reduces with increasing surface angle ( $C_i$ ,  $C_{ii}$ ) as well as increasing imaging depth ( $D_i$ ,  $D_{ii}$ ). The boxplot  
634 refers to intensity distributions from voxels identified in the topmost layer ( $d = 1$  is the apical most layer  
635 of  $4.8\mu\text{m}$  thickness) of four wing discs.

636 *Figure 4: Data based method to correct the intensity changes within curved epithelium*

637 A: 3 parameter normalisation matrix ( $d, Z, \theta$ ) constructed from six wing discs expressing CAAX-GFP to  
638 remove the intensity bias brought about due to surface geometry

639 B: Intensity bias was corrected using imaging depth alone or surface angle alone or using both imaging  
640 depth and sample geometry normalisation. The normalised pseudo-coloured images allow comparison of  
641 the intensity distribution of a layer of wing disc ( $d = 1$  is the apical most layer of  $4.8\mu\text{m}$  thickness) using  
642 different normalisation matrices. Three parameter normalisation works best in equalizing intensity (See  
643 more information in Methods). Scale Bar:  $50\mu\text{m}$ .

644 *Figure 5: Measuring concentration profiles with respect to a reference plane, Wingless production plane*

645 A-E: Concentration profiles of different probes (A: CAAX-GFP, B: E-cadherin, C: Rab7, D: Wg-GFP, E:  
646 Nucleus) were measured as a function of distance from producing cells. Cartoon representation of  
647 localisation is shown in (i), XZ orthogonal projection in (ii, dotted red line indicates Wg producing cells),  
648 raw normalised intensity profiles in (iii) and corrected normalised intensity profiles in (iv). Colours  
649 represent the layer number (refer to the LUT depicted in i), darker lines represent the mean and SEM,  
650 lighter lines represent individual traces across different stripes from discs ( $N = 4, 2, 3, 5, 4$ ). Scale bar:  $20$   
651  $\mu\text{m}$ .

652 *Figure 6: Neighbour exchanges observed along the apical-basal axis in 3D epithelium organisation*

653 A: Cell boundary segmentation and cell surface mesh reconstruction along the apico-basal axis of cells  
654 shown as XY(i) and XYZ (ii) views.

655 B: Pseudostratified cells show a diverse set of shapes. Based on cross-sectional area changes along the  
656 apico-basal axis, 188 cells (not including the dividing cells) were clustered into three categories using k-  
657 means clustering (i). While some cells show increased cross-sectional area at the top, some bulge in the  
658 centre and some towards the basal side. These were intuitively named as Inverted bowling pin (orange),  
659 Rolling pin (blue) and Bowling pin (green). The area changes across the apico-basal axis are indicated.  
660 Mean is shown as a thicker line (ii).

661 C: Dividing cells show increased Apical area and are restricted to the  $5-10\mu\text{m}$  in depth on the apical side  
662 (i). The cells surrounding the dividing cells occupy the volume below the dividing cells (ii).

663 *Figure 7: Neighbour exchanges observed along the apical-basal axis in 3D epithelium organisation*

664 A: Segmented cells (i) and the probability density function of the cross-sectional area of cells (ii) is  
665 shown at different depths from the apical surface. Compared to the apical plane, at larger depths from the  
666 surface, two populations of cells are observed. While the apical cell area is a tighter distribution,  
667 distribution of cell area at 5 $\mu$ m from the apical surface is broader reflecting cell populations which are  
668 smaller than apical area and bigger than apical area. N=329 reconstructed cells from two samples.

669 B: Cell neighbours are seen at distances of one cell diameter away on the apical side (i). These neighbours  
670 form contacts with the cell along the apico-basal length (ii). \* indicates the cell of interest.

671 C: The number of neighbours per cell at different depths from the apical surface averages at six  
672 neighbours per cell at all the depths (i). Probability density of unique neighbours per cell, including apical  
673 neighbours as well as neighbours observed along the apico-basal axis, averages at  $8.1 \pm 1.2$  neighbours.  
674 N=329 reconstructed cells from two samples.

675 D: Different styles of the neighbour exchanges are observed. The blue cells depicted in both examples are  
676 not neighbours at the apical side but form neighbours in the basal planes (i) or in the medial planes (ii).

677 E: Probability density function of number of neighbour changes/apico-basal intercalations observed per  
678 cell. On an average, each cell has  $4.2 \pm 1.7$  (Mean  $\pm$  SD) intercalations. N=329 reconstructed cells from 2  
679 samples.

680 F: Area changes along the apico-basal length is positively correlated with the number of neighbour  
681 changes.

**Figure 1**

**A.**

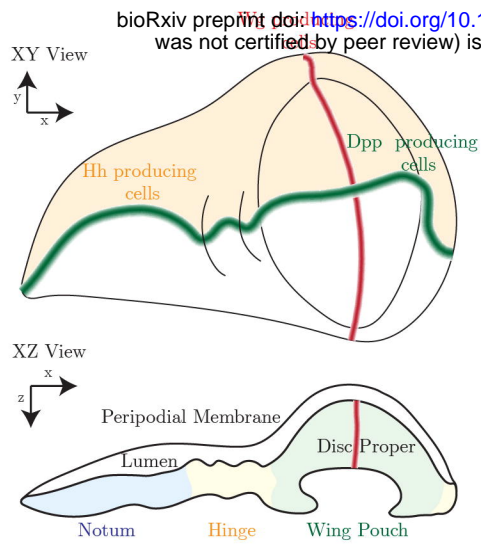

**B.**

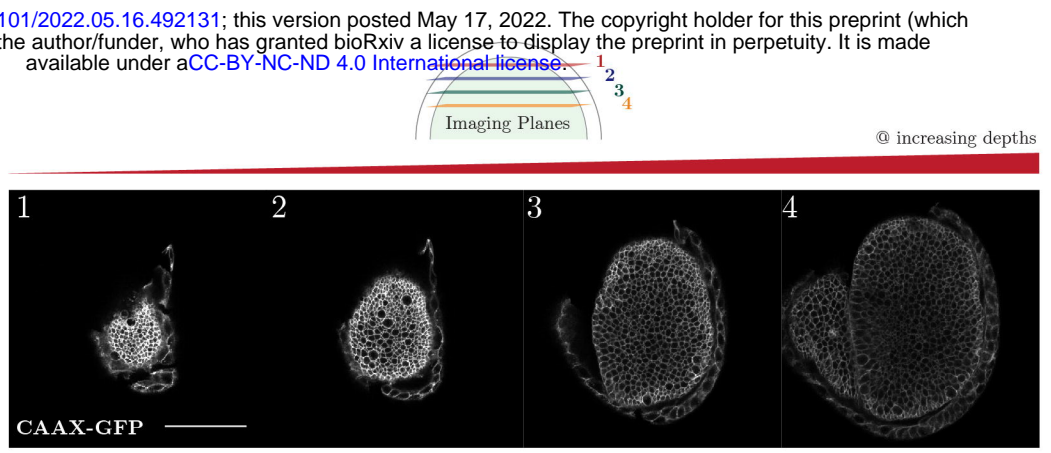

**C.**

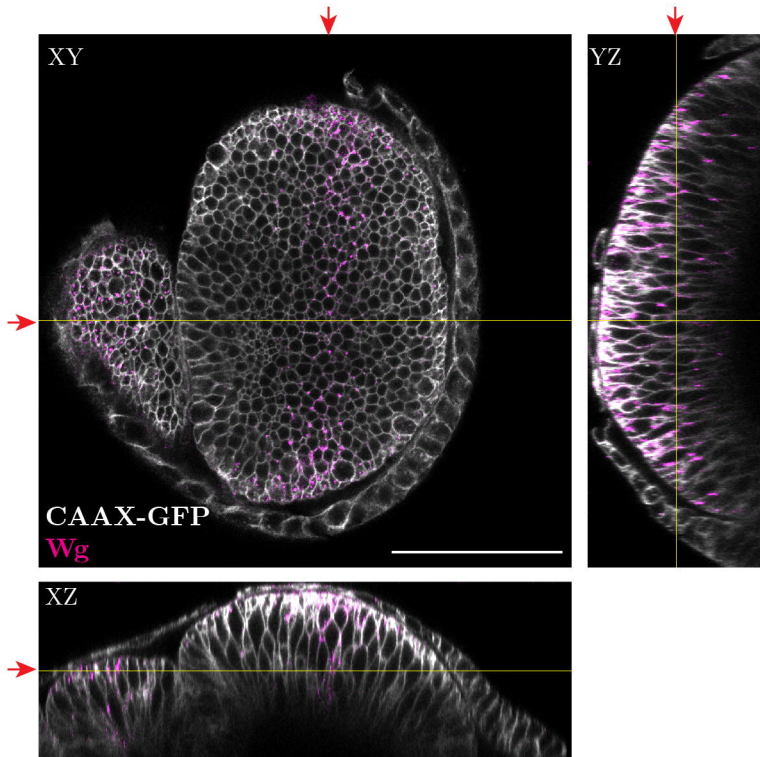

**Di.**

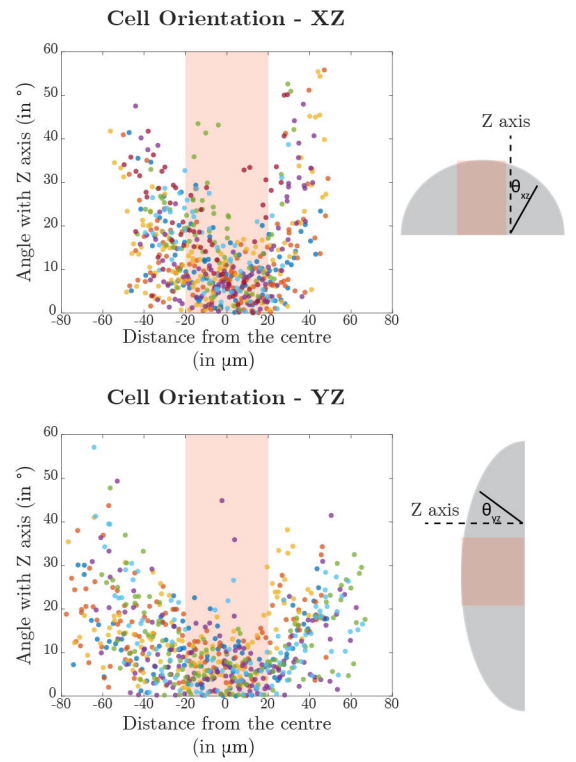

**Dii.**

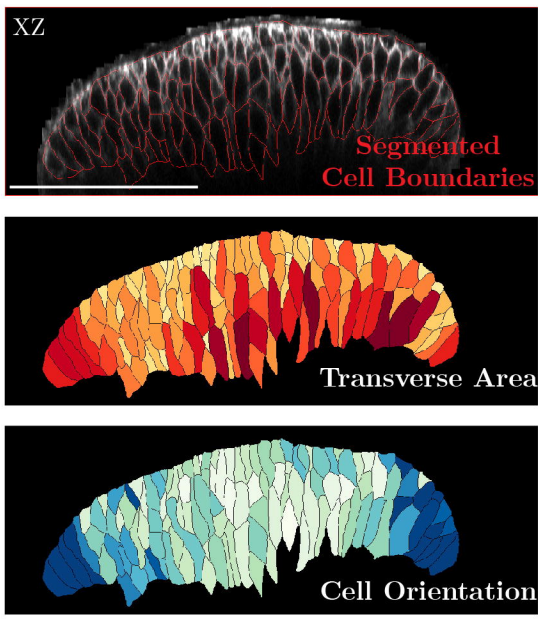

**Diii.**

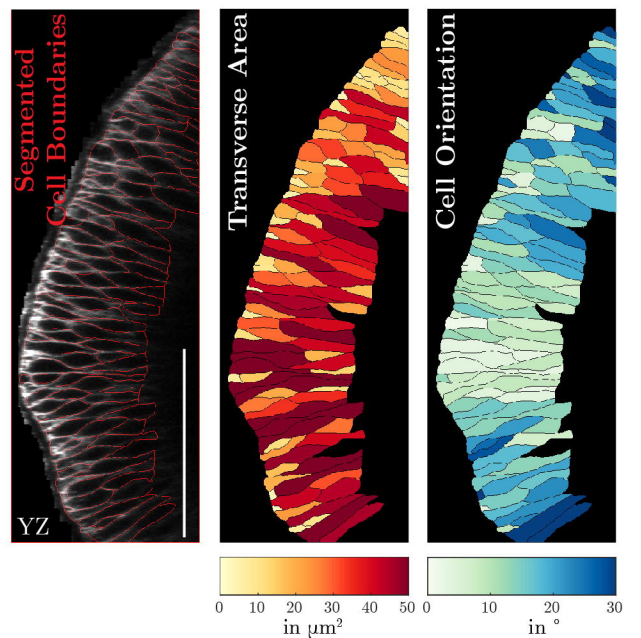

**Figure 2**

**A.** bioRxiv preprint doi: <https://doi.org/10.1101/2022.05.16.492131>; this version posted May 17, 2022. The copyright holder for this preprint (which was not certified by peer review) is the author/funder, who has granted bioRxiv a license to display the preprint in perpetuity. It is made available under a [CC-BY-NC-ND 4.0 International license](https://creativecommons.org/licenses/by-nc-nd/4.0/).

Create a mask of tissue of interest

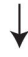

Define the outermost surface,  $S$

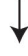

Estimate distances of all voxels to the surface,  $d$

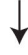

Identify voxels at different distances from surface

**B.** Identify the tissue of interest and reference plane

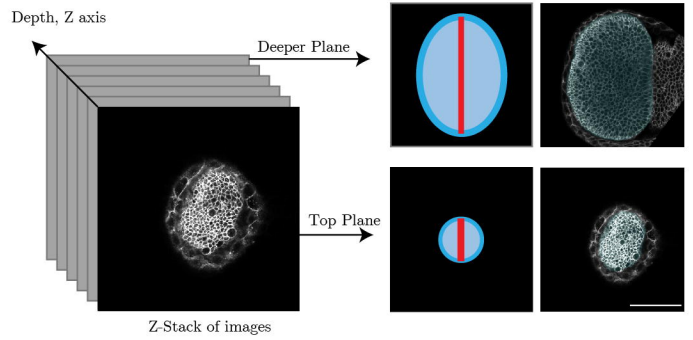

**C.**

Surface Point Cloud

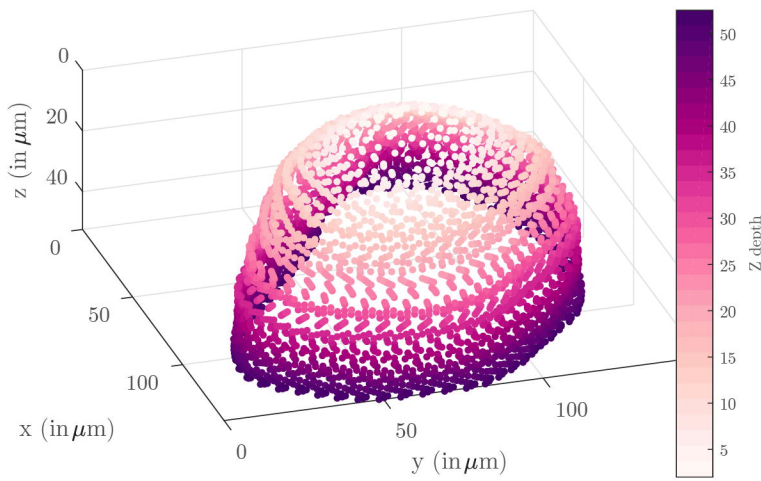

**D.**

Define Surface and Reference Plane

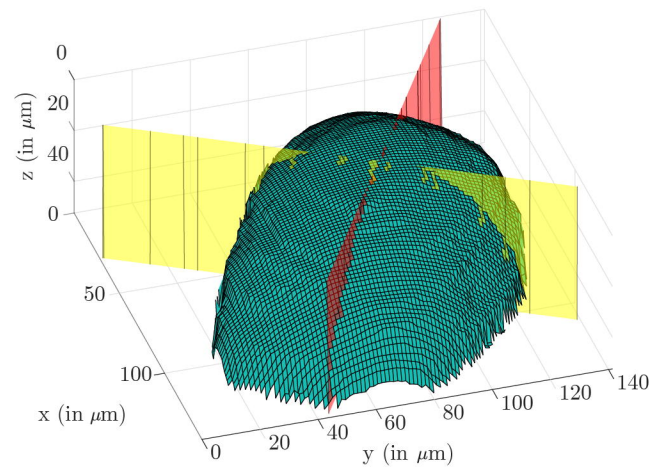

Red: Wg Production Plane    Yellow: Perpendicular Plane

Cyan: Surface of Wingpouch

**E.**

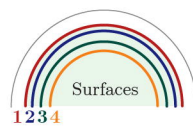

© increasing depths from surface

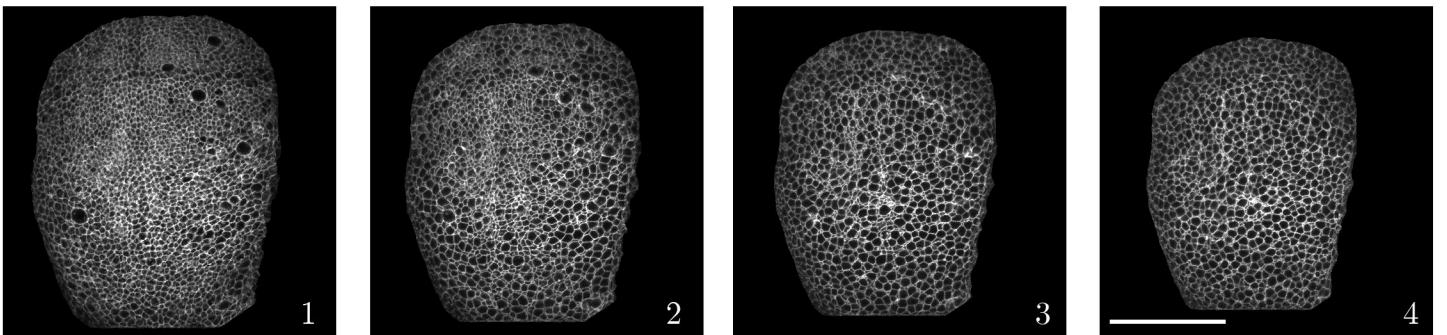

Figure 3

A. bioRxiv preprint doi: <https://doi.org/10.1101/2022.05.16.492131>; this version posted May 17, 2022. The copyright holder for this preprint (which was not certified by peer review) is the author/funder, who has granted bioRxiv a license to display the preprint in perpetuity. It is made available under aCC-BY-NC-ND 4.0 International license.

© increasing depths from surface

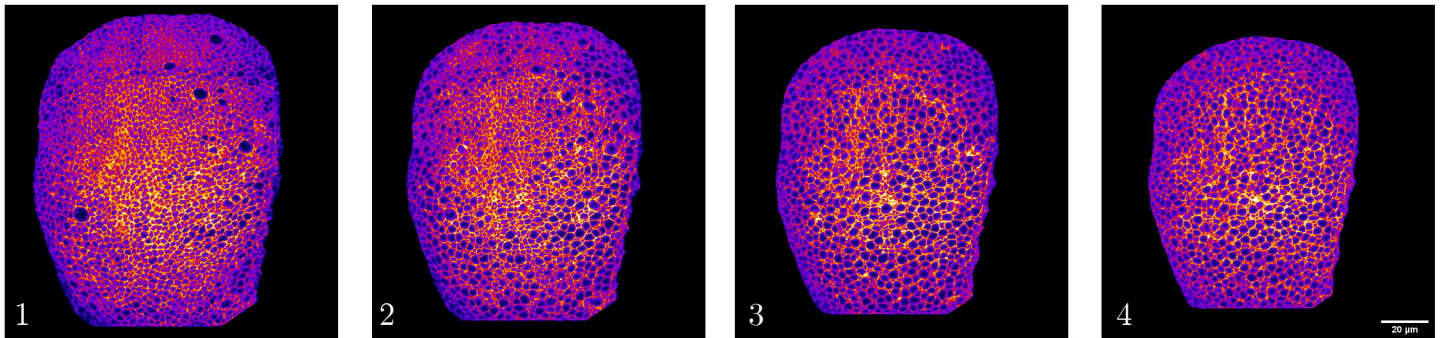

B.

$\theta$  : Angle between surface normal and illumination (vertical) axis

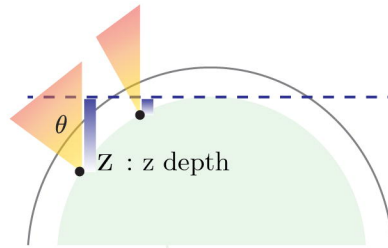

Ci.

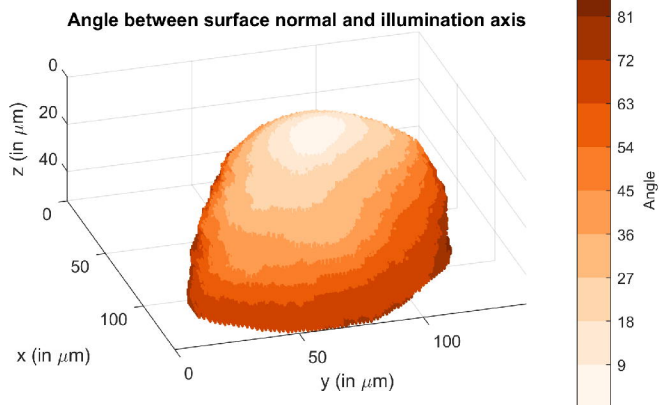

Di.

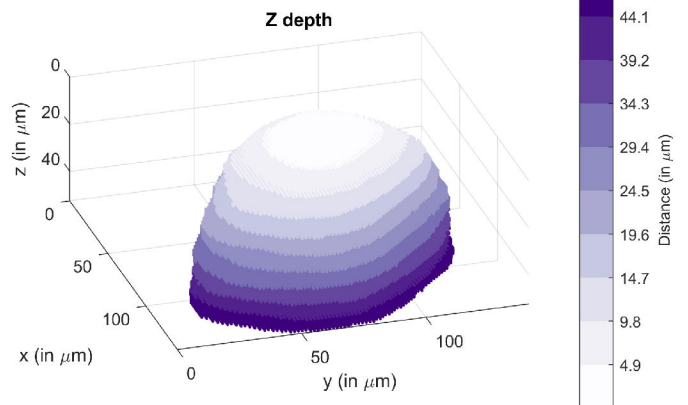

Cii. Intensity with surface angle

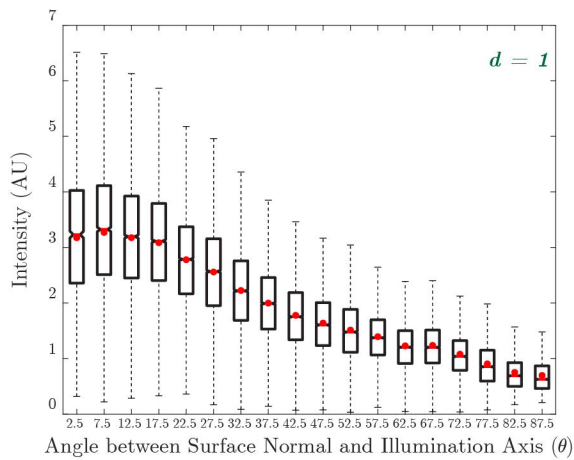

Dii. Intensity with z depth (z)

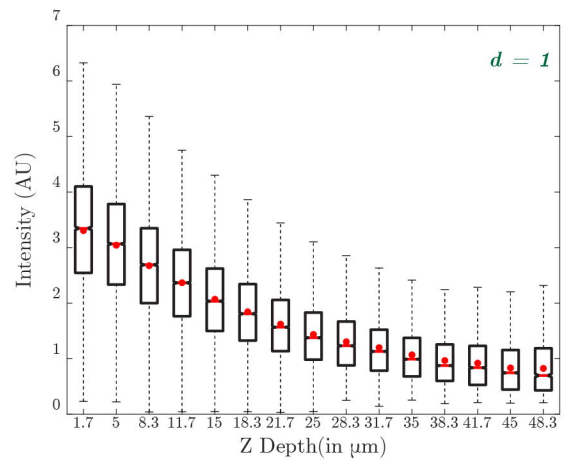

Figure 4

A.  $(d, \theta, z)$  Normalization Matrix

bioRxiv preprint doi: <https://doi.org/10.1101/2022.05.16.492131>; this version posted May 17, 2022. The copyright holder for this preprint (which was not certified by peer review) is the author/funder, who has granted bioRxiv a license to display the preprint in perpetuity. It is made available under a [CC-BY-NC-ND 4.0 International license](https://creativecommons.org/licenses/by-nc-nd/4.0/).

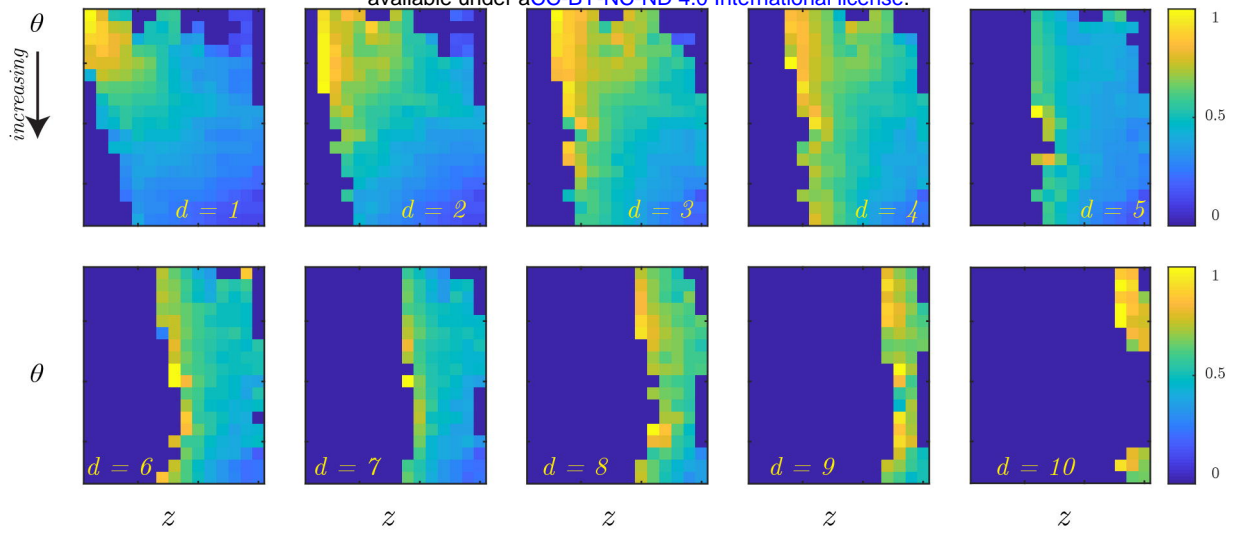

B. Raw      Depth Normalization      Surface Normalization      Surface and Depth Normalization

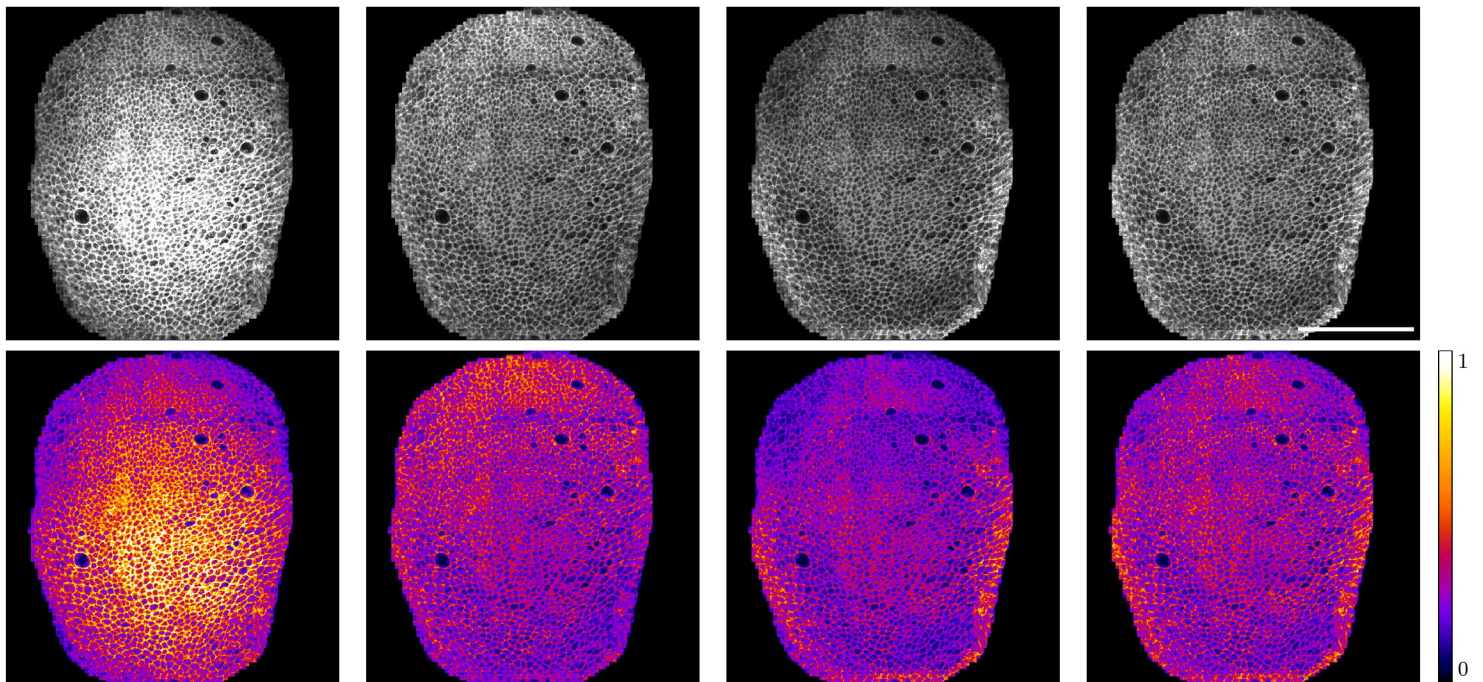

**Figure 5**

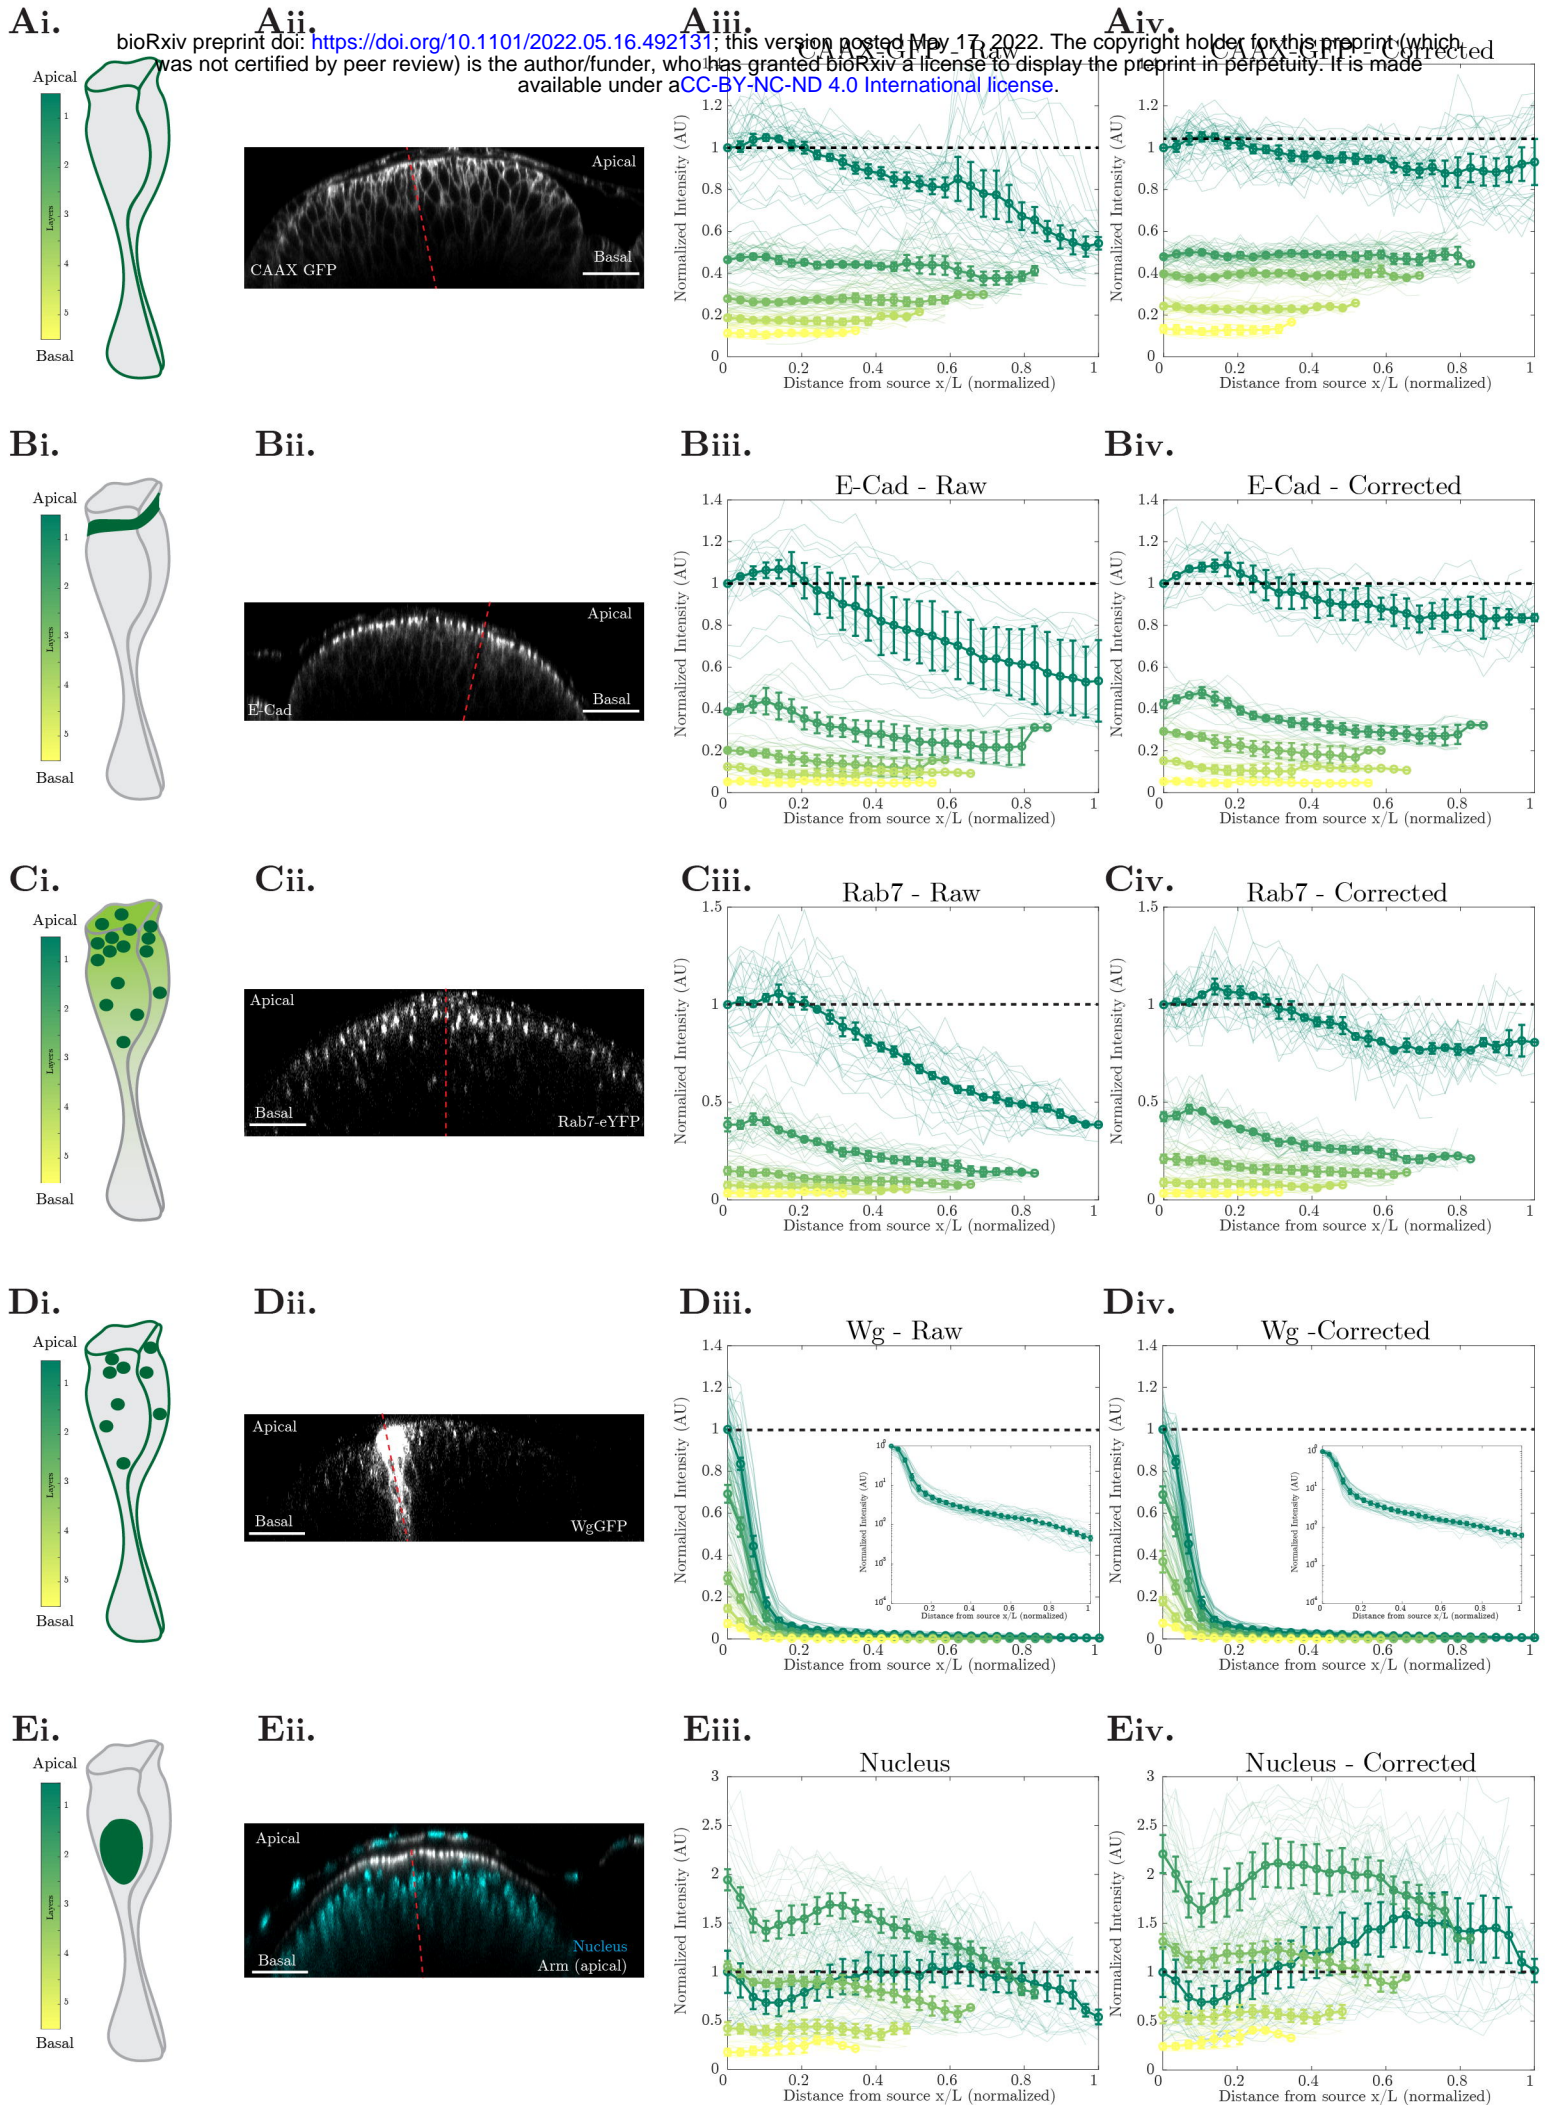



**Figure 6****Ai.**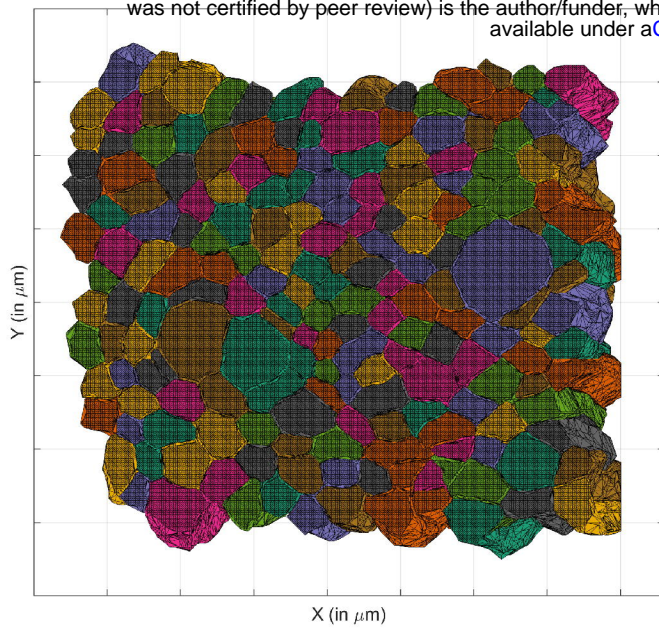**Aii.**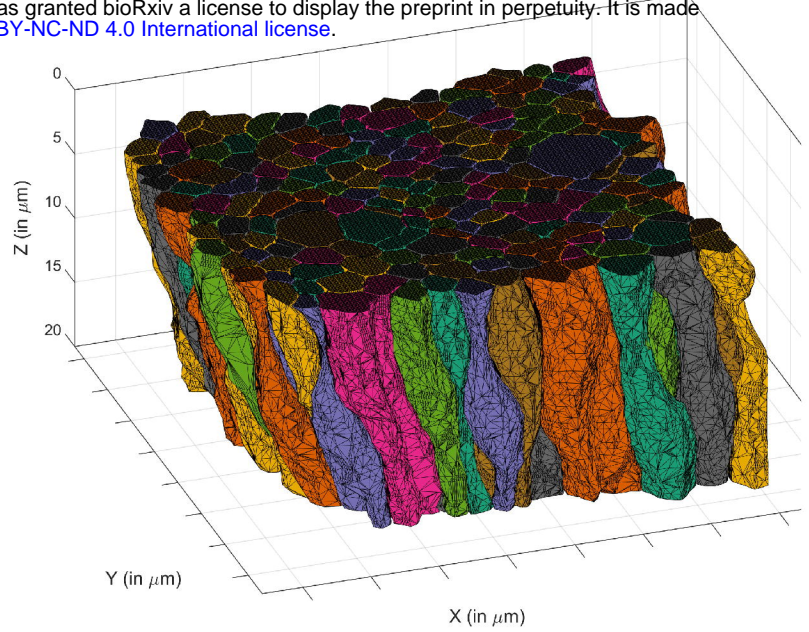**Bi.**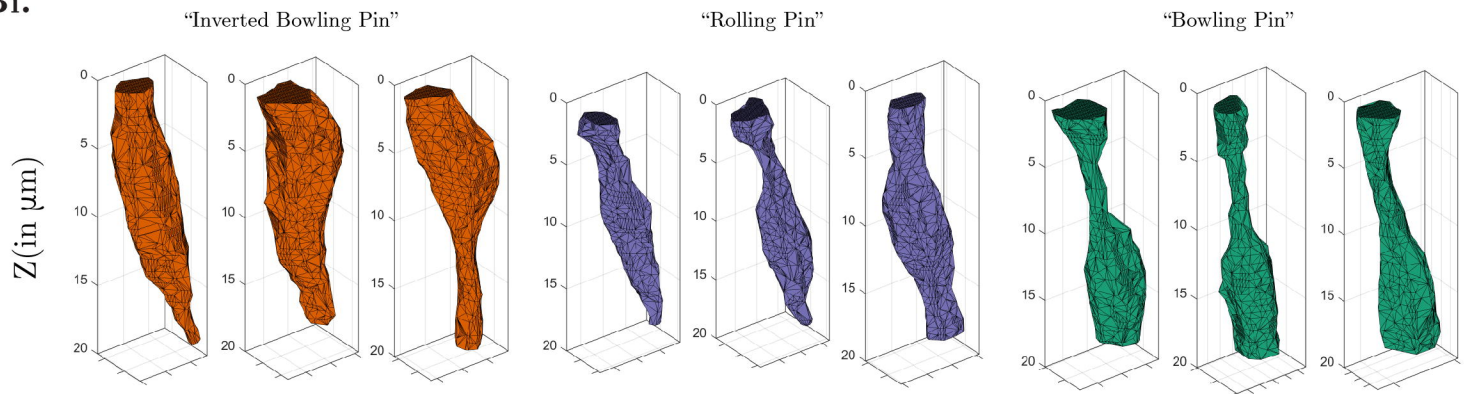**Bii.**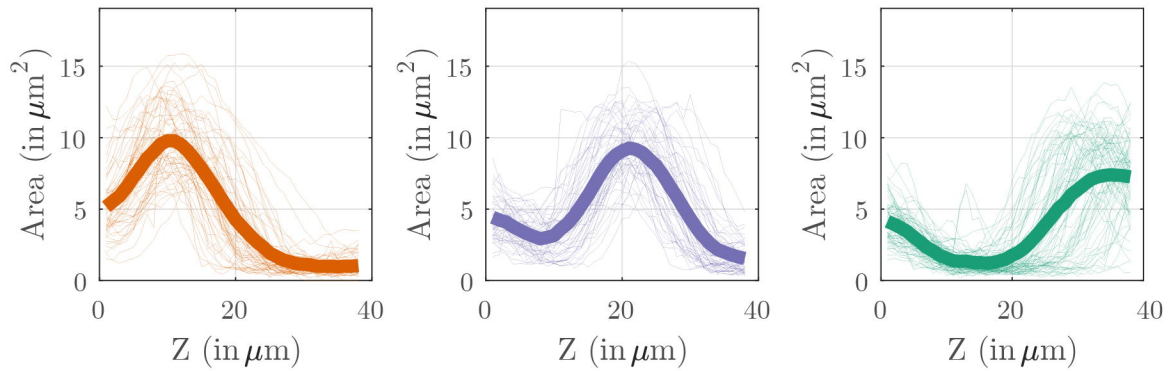**Ci.**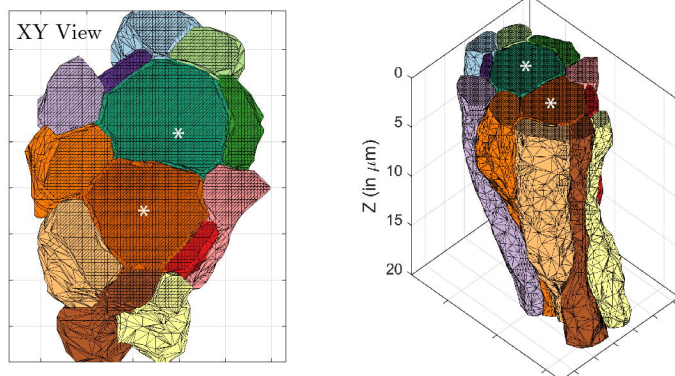**Cii.**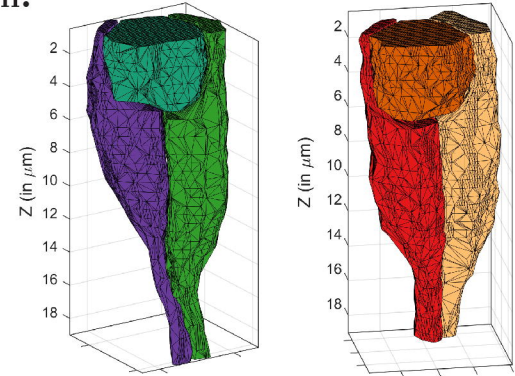

Figure 7

Ai.

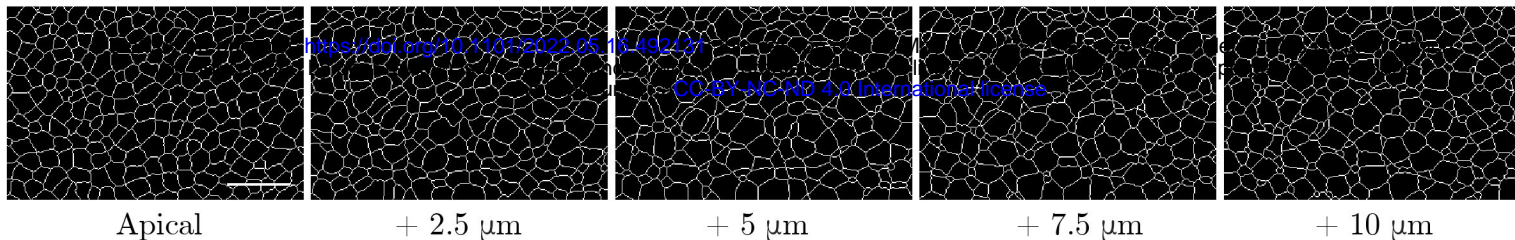

Aii.

Cell area at different depths from the apical surface

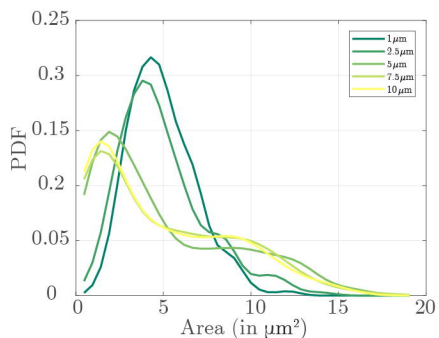

Ci.

Number of neighbours per cell at different depths from the apical surface

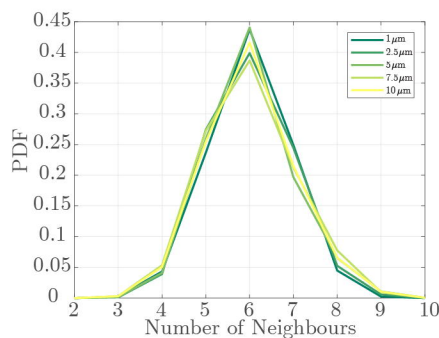

Cii.

Number of unique neighbours per cell

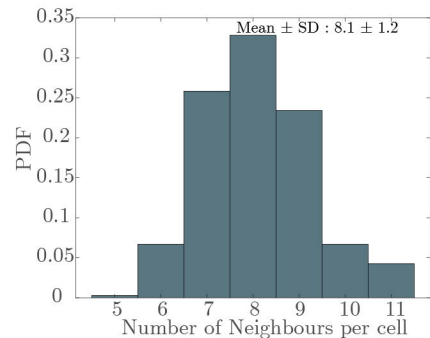

Bi.

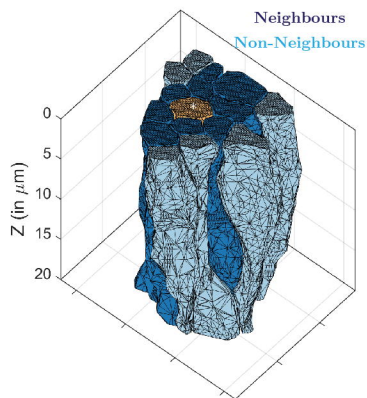

Di.

Neighbour exchanges along the apico-basal axis

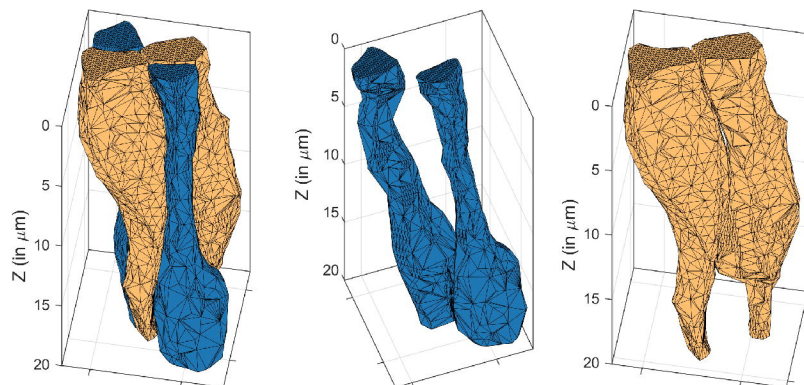

Bii.

Apical Neighbours

Basal Neighbours

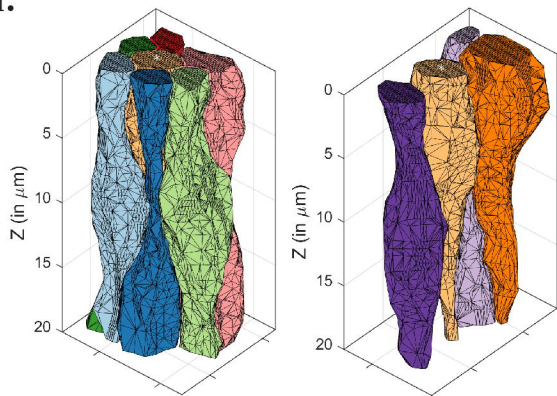

Dii.

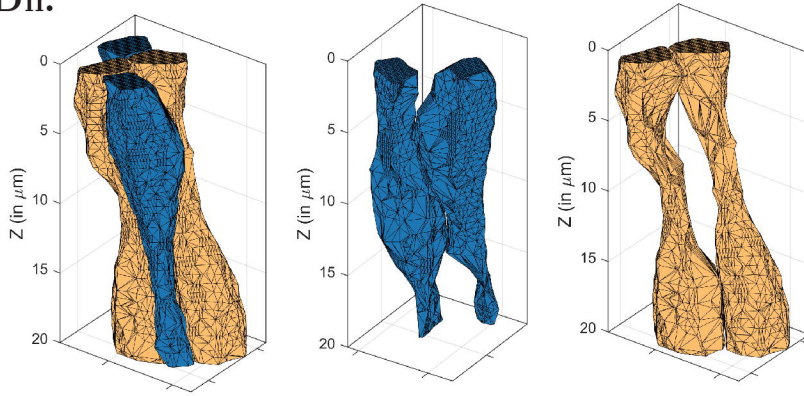

E.

Number of apico-basal intercalations per cell

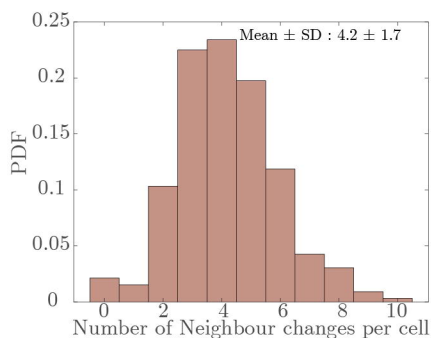

F.

Examples showing correlation between neighbour changes and cross-sectional area changes

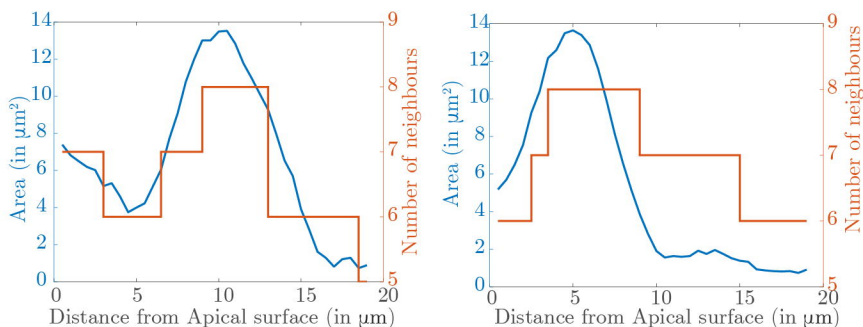

Source: https://www.biorxiv.org/content/10.1101/2022.05.16.492131v1.full.pdf
